# Supplementary material for: New ground ice maps for Canada using a paleogeographic modelling approach
Source: Copernicus journal article supplement (doi:10.5194/tc-2018-200), 2018-09-20
Supplement: Supplementary file [file tc-2018-200-RC1-supplement.pdf]

# New ground ice maps for Canada using a paleogeographic modelling approach

5 H. Brendan O'Neill<sup>1</sup>, Stephen A. Wolfe<sup>1</sup>, Caroline Duchesne<sup>1</sup>

<sup>1</sup>Geological Survey of Canada, Natural Resources Canada, 601 Booth St. Ottawa, Canada

*Correspondence to:* H. Brendan O'Neill: [hughbrendan.oneill@canada.ca](mailto:hughbrendan.oneill@canada.ca)

10 The works published in this journal are distributed under the Creative Commons Attribution 4.0 License. This licence does not affect the Crown copyright work, which is re-usable under the Open Government Licence (OGL). The Creative Commons Attribution 4.0 License and the OGL are interoperable and do not conflict with, reduce or limit each other.

© Her Majesty the Queen in Right of Canada, as represented by the Minister of Natural Resources, 2018

## Abstract

Ground ice melt caused by climate-induced permafrost degradation may trigger significant ecological change, damage infrastructure, and alter biogeochemical cycles. The fundamental ground ice mapping for Canada is now >20 years old, and does not include significant new insights gained from recent field and remote sensing based studies. New modelling incorporating paleogeography is presented in this paper to depict the distribution of three ground ice types (**massive ice** and icy sediments, segregated ice, and **wedge ice**) in northern Canada. The modelling uses an expert-system approach in a geographic information system (GIS), founded in conceptual principles gained from empirically-based research, to predict ground ice abundance in near-surface permafrost. Datasets of surficial geology, deglaciation, paleovegetation, glacial lake and marine limits, and modern permafrost distribution allow representations in the models of paleoclimatic shifts, tree line migration, marine and glacial lake inundation, and terrestrial emergence, and their effect on ground ice abundance. The model outputs are generally consistent with field observations, indicating abundant relict massive ice and icy sediments in the western Arctic, where <sup>they have</sup> ~~it has~~ remained preserved since deglaciation in thick glaciogenic sediments in continuous permafrost. **Segregated ice** is widely distributed in fine-grained deposits, occurring in highest abundance in glacial lake and marine sediments. The modelled abundance of wedge ice largely reflects the exposure time of terrain to low air temperatures in tundra environments following deglaciation or marine/glacial **lake** inundation, and is thus highest in the western Arctic. Holocene environmental changes result in reduced <sup>in the areas</sup> ~~ice~~ abundance where tree line advanced during warmer periods. Published observations of thaw slumps and <sup>massive-</sup> ~~ice~~ exposures, segregated ice and associated landforms, and ice wedges allow a favourable preliminary assessment of the models, and the results are generally comparable with the previous ground ice mapping for Canada. However, the model outputs are more spatially explicit and better reflect observed ground ice conditions in some regions. Synthetic modelling products that incorporated the previous ground ice information may therefore include inaccuracies. The presented modelling approach is a significant advance in permafrost mapping, but additional field observations and volumetric ice estimates from more areas in Canada are required to improve calibration and validation of small-scale ground ice modelling.

## 1 Introduction

Ground ice is a key geomorphic agent in permafrost environments, and its formation is associated with characteristic landforms including ice-wedge polygons (Fraser et al., 2018; Lachenbruch, 1962), peat plateaus, palsas, and lithalsas (Laberge and Payette, 1995; Wolfe et al., 2014; Zoltai, 1972), earth hummocks (Kokelj et al., 2007b), involuted hills (Mackay and Dallimore, 1992), and pingos (Mackay, 1973). The degradation of ice-rich permafrost initiates geomorphic processes including thaw subsidence, slumping, active-layer detachment sliding, thaw lake development, and thermal erosion gullying (Kokelj and Jorgenson, 2013). These processes partly drive the evolution of permafrost terrain to produce the current landscape and ecological configuration, and may also damage infrastructure (Jorgenson et al., 2006; Liljedahl et al., 2016; Nelson et al., 2001; Reynolds et al., 2014). The nature and distribution of ground ice controls specific processes and the impacts of thaw on permafrost terrain. For example, melt of massive ice and icy sediments may result in the formation of deep thaw lakes in flat terrain (Burn, 2002; Dallimore et al., 2000), and large retrogressive thaw slumps on hillslopes (Kokelj et al., 2017). Segregated ice melt may lead to shallow pond and thaw lake development (Hopkins, 1949), and smaller thaw slumps and active-layer detachment slides on hillslopes (Burn and Lewkowicz, 1990; Lewkowicz, 2007). Ice wedge melt may form thermokarst pits and troughs in flat terrain (Jorgenson et al., 2006, 2015; Kokelj and Jorgenson, 2013) and thermal erosion gullies on hillslopes (Fortier et al., 2007; Fraser et al., 2018).

The Permafrost map of Canada (PMC) compiled by Heginbottom et al. (1995) remains the primary source depicting ground ice information for the entire country. The ground ice mapping has proven of broad utility across disciplines and is used as input for other products including thermokarst and permafrost hazard potential mapping (e.g., Nelson et al., 2001; Olefeldt et al., 2016). However, the ground ice information is now over two decades old and does not include newer insights on ground ice conditions from field and remote sensing based studies. In addition, the map units are based on broad physiographic regions that include a variety of landscape types and surficial sediments, and thus the ground ice depiction lacks spatial detail. Given anticipated climate-driven permafrost thaw and the recent acceleration of thermokarst processes across circumpolar regions (Fraser et al., 2018; Jorgenson et al., 2006; Lantz and Kokelj, 2008; Liljedahl et al., 2016; Rudy et al., 2017), improving knowledge of ground ice conditions is of critical societal and environmental relevance. The broad aims of this paper are to (1) present a new paleogeographic approach to modelling the abundance of three ground ice types in permafrost, (2) present resulting ground ice maps for Canada, and (3) conduct a preliminary assessment of the model outputs. The specific modelling objectives are to (i) produce an improved depiction of ground ice conditions in Canada that incorporates knowledge gained from recent empirical studies, (ii) encourage the development of questions and hypotheses to guide new empirical ground ice investigations, and (iii) identify requirements to advance future modelling and mapping efforts.

## 2 Background

Ground ice information on the PMC includes qualitative estimates of the volumetric percentage of segregated and intrusive ice in the upper 10-20 m of permafrost (Heginbottom and Dubreuil, 1993). The relative abundance (abundant, sparse, absent) of larger ice bodies is represented separately using symbols for massive ice, ice wedges, and pingos. The map polygons were

based on 141 physiographic regions (Bostock, 1970), with some subdivided based on the distribution of permafrost, resulting in 171 map units (Heginbottom and Dubreuil, 1993). The mapping was developed using a database of available ground ice observations, mostly from western Canada. Data ~~data~~ gaps were filled by assessing available geological and environmental conditions, and comparing them to adjacent units or others with similar attributes (Heginbottom and Dubreuil, 1993). Ice conditions were then assigned to units with similar physiographic attributes. Therefore, much of the mapping in the central and eastern Arctic represents extrapolations based on conditions in the western Arctic.

The ground ice information from the PMC was included on the Circum-Arctic Map of Permafrost and Ground-ice Conditions (Brown et al., 1997). While most of the original elements were maintained, some modifications were included in the circum-Arctic representation. The polygons were shaded based on the overall visible ice content in the upper 10-20 m of permafrost, **in contrast** with the Heginbottom et al. (1995) map, which excluded massive ice, pingos, and ice wedges from the numerical estimates (Brown et al., 1997; Heginbottom and Dubreuil, 1993). However, this did not result in a change to 'high' visible ice content on the legends, which is >20% on both maps. The symbols depicting the relative abundance of larger ice bodies were maintained. Another modification was the differentiation of map polygons into areas with thin (<5-10 m) and thick (>5-10 m) overburden cover (Brown et al., 1997). In general, this distinction separated the sediment-poor Canadian Shield and areas of exposed weathered bedrock from areas underlain by sedimentary rock with more extensive and thick surficial deposits. The depicted ground ice contents are generally lower in regions with thin overburden (Brown et al., 1997), but the nature and origin of surficial deposits were not explicitly considered.

The modelling approach presented here builds on that of Jorgenson et al. (2008) for recent mapping in Alaska. The authors assessed excess ice content – the volumetric ice content in excess of soil pore space – in the top 5 m of permafrost from various ice types, based primarily on surficial geology and permafrost distribution. The ice contents generally correspond to soil texture, with fine-grained, frost-susceptible units assigned the highest values, and buried ice recognized in glacial deposits (Jorgenson et al., 2008). The influence of time and the mode of permafrost aggradation (epigenetic vs. syngenetic) on segregated and wedge ice content were also considered by differentiating old and young glacial deposits, and by recognizing high ice contents in aggraded loess and re-transported colluvial sediments (Jorgenson et al., 2008). Our assessment similarly uses surficial geology as a base dataset. The 1:5,000,000 scale Surficial geology of Canada consists of 10,325 polygons with an average area of about 880 km<sup>2</sup> over Canada's landmass (Geological Survey of Canada, 2014). By comparison, the average area of the polygons on the Heginbottom et al. (1995) map is about 53,200 km<sup>2</sup>. Thus, the surficial geology dataset is more spatially detailed and may better represent variation in conditions that control ground ice than the modified physiographic map of Bostock (1970).

Three common forms of excess ground ice in permafrost are modelled: (1) **relict massive ice and icy sediment**, (2) segregated ice, and (3) wedge ice, each defined specifically in Sect. 2.1. Volumetric excess ice abundance in the top 5 m of permafrost is reported qualitatively. This depth is considered because wedge and segregated ice **content** **growth** is commonly highest within several metres ~~of~~ <sup>below</sup> the permafrost table (Jorgenson et al., 2008; Pollard and French, 1980), and because **increases in active layer thickness** caused by climate variation and surface disturbances are typically restricted within this range (Burn,

1998; Mackay, 1995). Pingos are not modelled, as they form due to local geologic and hydraulic conditions, are easily mapped from observations (Jones et al., 2012; Jorgenson et al., 2008; Mackay, 1963), and comprise a low proportion of near-surface ground ice volume even in areas where they are abundant (Pollard and French, 1980).

5 Rather than extrapolating field observations from northwestern Canada to similar physiographic units across the Arctic (Heginbottom et al., 1995), we model ground ice abundance using an expert-system approach built on principles developed from empirical studies relating environmental conditions to ground ice formation and preservation. The principles are formalized in a GIS using spatio-temporal datasets, and ground ice abundance for each ice type is calculated using map algebra (i.e., raster calculation). The models account for broad-scale Holocene environmental changes including deglaciation, glacial lake and marine inundation, and paleovegetation shifts. Temporal criteria are fundamental for modelling the thermal state of permafrost (Riseborough et al., 2008), but in the authors' knowledge have not been considered explicitly in ground ice modelling on a continental scale. Many of the studies and datasets key to the model development were unavailable during production of the PMC, and thus the model outputs represent an updated understanding of ground ice conditions in Canada.

## 2.1. Ground ice types

### 2.1.1. Massive ice (and icy sediments)

15 Here massive ice is considered as relict <sup>tabular</sup> bodies or layers of massive ice and/or icy sediment (e.g., Murton et al., 2005; Rampton and Mackay, 1971), preserved in permafrost under overburden by persistent cold-climate conditions. Massive ice and icy sediment may consist of either (1) buried glacier ice (French and Harry, 1988, 1990; Lorrain and Demeur, 1985; St-Onge and McMartin, 1995), or (2) intrasedimental ice formed by segregation, injection, or a combination thereof (Mackay and Dallimore, 1992; Rampton, 1988a). Buried glacier ice in Canada is predominantly found within large hummocky moraine belts and glaciofluvial deposits (Coulombe et al., 2015; Dyke and Savelle, 2000; French and Harry, 1990; Kokelj et al., 2017; Lakeman and England, 2012; Murton et al., 2005), and may consist of englacial or basal ice preserved by an overburden of ablation till or outwash (Evans, 2003).

25 Tabular bodies of massive intrasedimental ice have been identified in some regions of northern Canada (Dallimore and Wolfe, 1988; French and Harry, 1990; Fritz et al., 2011; Mackay and Dallimore, 1992; Murton, 2005; Pollard, 2000). This ice is considered to form by segregation and/or intrusion at the interface between layers of fine-grained and coarse-grained deposits during epigenetic permafrost growth (Mackay, 1971). The underlying unfrozen stratum supplies the water for ice growth. Isotopic evidence indicates that massive intrasedimental ice is commonly of glacial meltwater origin (Mackay and Dallimore, 1992). Thick ice growth is considered to be facilitated by high pore water pressures that develop during freezing of saturated sands (pore water expulsion) or by glacial meltwater driven toward aggrading permafrost near an ice sheet margin (Mackay and Dallimore, 1992; Rampton, 1988a). Debate remains over the origin (buried glacier ice vs. intrasedimental ice) of some ice-cored terrain in northern Canada due to the similar morphological appearance, associated surficial materials, and distribution near margins of the late-Wisconsinan Laurentide Ice Sheet (LIS) (Evans, 2003). The massive ice model does not

account for the localized hydraulic and stratigraphic conditions that may form intrasedimental ice, so the results should be considered representative of relict buried glacier ice, though segregated-intrusive ice may form locally within the same glacial deposits (Murton et al., 2005).

### 2.1.2. Segregated ice

5 Segregated ice consists of discrete ice lenses or layers that form by migration of unfrozen pore water towards a freezing front (Taber, 1929). Segregated ice growth results in frost heaving, a displacement of the ground surface due to the volumetric increase of the soil as ice forms (Miller, 1972). Here we consider segregated ice that forms: (1) due to upward water migration to the freezing front during epigenetic (downward) permafrost growth, and (2) at the top of permafrost due to a net annual downward water migration from the active layer (Cheng, 1983; Mackay, 1983). Examples of (1) include the segregated ice that forms lithalsas, palsas, and peat plateaus (Allard et al., 1996; Calmels et al., 2008a; Laberge and Payette, 1995; Wolfe et al., 2014). The mechanism of (2) causes gradual ice enrichment near the top of permafrost and may result in relatively thick zones of layered ground ice if the permafrost table rises over time (Burn, 1988; Kanevskiy et al., 2011). Specific examples of (2) include the ice visible in exposures above thaw unconformities in northwestern Canada (Burn, 1988; Kokelj and Burn, 2003), in near-surface sediments of drained-lake basins (Mackay and Burn, 2002a; Morse et al., 2009; O'Neill and Burn, 2012), in aggraded alluvial settings (Kokelj and Burn, 2005; Morse et al., 2009), and in yedoma sequences (Kanevskiy et al., 2011). It should be noted that both (1) and (2) can occur within the same landform (e.g., in lithalsas and palsas).

This segregated ice is considered to differ from beds of intrasedimental ice, as individual layers of ice are considerably thinner and less extensive, exhibit a different cryostructure, and are not associated with elevated pore water pressure in an underlying aquifer during formation. Segregated ice is widely distributed in fine-grained material in Canada, whereas intrasedimental ice is considered to have formed in spatially and temporally restricted proglacial settings during recession of the Laurentide Ice Sheet (Rampton, 1988a), or smaller ice caps (Robinson and Pollard, 1998).

### 2.1.3. Wedge ice

Wedge ice develops when low winter temperatures cause the ground to contract under stress and crack (~~Lachenbruch, 1962~~). Melt water later infills the cracks and freezes in permafrost, forming thin ice veins. Cracking in subsequent years occurs preferentially at existing ice veins because the tensile strength of the ice is lower than that of the surrounding frozen sediment (Leffingwell, 2015; ~~Lachenbruch, 1962~~). Repeated cracking, water infilling, and refreezing causes the growth of an ice wedge over time. Ice wedge growth is thus controlled by winter temperature conditions and the time available for ice accumulation (Hamilton et al., 1983; Mackay and Burn, 2002b; Opel et al., 2018). Wedge ice may comprise a significant volume of the upper ground in permafrost areas (Kanevskiy et al., <sup>2011</sup>2013; Pollard and French, 1980; Ulrich et al., 2014), and the <sup>partial</sup>thaw of ~~polygonal terrain~~ ~~underlain by~~ ice wedges can lead to ground subsidence that spurs marked ecological changes (Fraser et al., 2018; Jorgenson et al., 2006, <sup>2015</sup>Liljedahl et al., 2016).

### 3 Datasets and methods

Ground ice in permafrost today is the result of past geological and environmental processes affecting its formation, preservation, and decay (Gilbert et al., 2016). We model ground ice evolution over the last 17 ka in Canada. Ground ice formed in unglaciated terrain prior to deglaciation **is thus not considered**. The 1:5,000,000 scale Surficial geology <sup>map</sup> of Canada forms the basis of the three ground ice models (Geological Survey of Canada, 2014). Surficial geology units were modified using data from the Glacial map of Canada (Prest et al., 1968) and the bedrock Geological map of Canada (Wheeler et al., 1996) to better reflect physical conditions pertinent to ground ice formation. The distribution of hummocky terrain from the Glacial map of Canada was added to the surficial dataset, as these ‘controlled moraine’ deposits commonly host relict ground ice in permafrost regions (Dyke and Savelle, 2000; Evans, 2009; Kokelj et al., 2017), which are not adequately represented on the Surficial geology of Canada map. The surficial dataset was further modified by combining nearshore and offshore glaciomarine and marine units, respectively, as these typically include sediments with comparable soil textures in both depositional settings (Geological Survey of Canada, 2014), and thus have similar frost susceptibility.

Areas underlain by igneous, metamorphic, and volcanic bedrock were differentiated from those underlain by sedimentary bedrock using the Geological map of Canada (Wheeler et al., 1996). Till units from the Surficial geology of Canada map were reclassified as either fine-grained (sedimentary bedrock derived) or coarse-grained (shield bedrock derived) units to reflect characteristic differences in matrix texture controlled by bedrock source (Fulton, 1989). These changes resulted in 27 surficial material units represented in our models (Fig. S1). Each unit was assessed in terms of general grain size characteristics and deposit type, which are pertinent to ground ice formation and permafrost preservation. For example, fine-grained offshore lacustrine and marine units are highly frost susceptible, favouring the formation of segregated ice (e.g., Chamberlain, 1981) and a protective surface organic layer (Tarnocai et al., 2011), whereas dominantly coarse-grained deposits are less frost susceptible and less likely to support permafrost in warmer climates (Jorgenson et al., 2008). Similar to the Brown et al. (1997) map, we consider overburden thickness in our assessment, based on surficial material units, i.e., sediment veneers vs. blankets (Fig. S1).

<sup>deglaciation</sup>  
A time series of ~~deglacial~~ and paleovegetation maps (Dyke et al., 2004) was used to iteratively modify ground ice abundance through 14 time steps from 14 ka BP to 1 ka BP (17.2 cal ka BP to 0.9 cal ka BP; Fig. S2). Four biome classes were considered to generalize climate and permafrost conditions during this period: i) herb tundra (very cold continuous permafrost); ii) shrub and alpine tundra (cold continuous permafrost); iii) forest tundra (warm **extensive discontinuous** permafrost); iv) **boreal forest** and all other biomes (sporadic or isolated permafrost and seasonally frozen ground) (e.g., Burn and Kokelj, 2009; Heginbottom et al., 1995; Smith et al., 2010). The biome distributions <sup>indicate</sup> ~~control~~ the rate of wedge ice accumulation and the melt of massive and segregated ice in the models due to transitions between tundra and forest during the Holocene (Fig. 1). The time series of ice sheet, glacial lake, and marine limit configurations on the paleovegetation maps are originally from <sup>Deglaciation</sup> ~~deglacial~~ maps for North America (Dyke et al., 2003), and are used to define the timing of subaerial exposure in the wedge ice model (Fig. 1). Maximum glacial lake and marine limits from the Glacial map of Canada (Prest et al., 1968) were used to represent

Holocene thaw of massive ice due to submergence (Fig. 1). Justification for the inclusion of these processes and responses in the models is provided in Sections 3.1–3.3. with reference to the pertinent literature. The contemporary permafrost distribution was used to modify ice abundance based on the likelihood of permafrost in different surficial material units (Heginbottom et al., 1995).

5           The original vector datasets were converted to raster with 1 km<sup>2</sup> pixels. The spatial resolution was used to produce smooth cartographic boundaries, though the typical map unit of the underlying surficial geology dataset is much coarser in resolution, and the paleovegetation and deglacial limits are generalized (Fig. S2). Ground ice abundance in the top 5 m of permafrost is reported for each ice type qualitatively as ‘high’, ‘medium’, ‘low’, ‘negligible’ and ‘none’. The ‘none’ class represents no excess ground ice in non-permafrost areas, and a general absence in permafrost regions, since areas mapped as  
10 bedrock at the scale of the surficial geology dataset may include some sediment cover that hosts ground ice. The model uses ranked numeric values to account for ground ice abundance in the computational steps, but these do not represent absolute quantities or percentages.

### 3.1. Massive ice model

The massive ice model represents ~~Holocene melt of~~ relict ice preserved near former ice sheet margins during deglaciation. An  
15 initial numeric abundance value is assigned to each surficial material unit in the GIS. Values are highest for thick, fine-grained hummocky till and moraine deposits, as these commonly include buried glacier ice (Evans, 2003; Kokelj et al., 2017), and are associated with past ice margins where conditions may have been conducive to intrasedimental ice development (Mackay and Dallimore, 1992; Rampton, 1988a; Table S1). Glaciofluvial sediments are assigned a medium value, as glacier ice may be buried by outwash deposits (Coulombe et al., 2018; Evans, 2003; Wolfe et al., 2017). Values are modified through the 14 time  
20 steps based on changes in biome distributions and marine and glacial lake inundation, representing melt due to large-scale Holocene environmental changes (Table S2). The partial melt of massive ice is assumed in the modern continuous permafrost zone when tundra transitions to forest tundra and/or boreal forest during the Holocene, as a warmer climate and wildfires near tree line cause increases in active-layer thickness that may partially thaw near-surface permafrost (Kokelj et al., 2017; Mackay, 1995; Murton, 2001). Marine and glacial lake inundation reduce massive ice abundance to zero in the model (Table S2).  
25 Although marine settings may preserve ground ice in cold saline waters, most submerged sediments would be subject to a range of water depths and temperatures that are more likely to thaw massive ice than preserve it. Dyke and Savelle (2000) have indicated that moraine volumes are considerably reduced where they extend below marine or glacial lake inundation limits. This reduction indicates that inundation either prevented the formation of massive ice or caused it to melt rapidly (Evans, 2003). Finally, the modern-day permafrost distribution is applied and massive ice remains preserved in the continuous  
30 permafrost zone. Massive ice is considered to melt completely from the modern discontinuous permafrost zone ~~in the model~~, where ground temperatures are relatively high and frequent forest fires cause significant increases in active-layer thickness (Burn, 1998; Viereck, 1983). The latitudinal decline of slump-affected terrain in the western Arctic over the transition to discontinuous permafrost likely reflects this thaw of relict near-surface ground ice (Kokelj et al., 2017), and there have been



no reported observations of massive ice at exposures in the discontinuous permafrost zone in Canada (Table S3). The resulting values represent the relative abundance of relict massive ice and icy sediments presently preserved in permafrost.

### 3.2. Segregated ice model

An initial segregated ice value is assigned to each surficial material (Table S4), representing the frost susceptibility based on general soil texture (Chamberlain, 1981). ~~General soil texture and~~ frost susceptibility was assessed for each surficial material unit using legend descriptions from the Surficial geology of Canada map, descriptions in other source material (e.g., Fulton, 1989), and expert knowledge of the surficial geology of northern Canada (Table 1). Smith and Burgess (2004) similarly assigned frost susceptibility values to surficial material units in an assessment of the physical response of permafrost terrain to climate warming. The segregated ice values may decline following biome transitions from tundra to boreal forest, reflecting the partial melt of near-surface ground ice during Holocene warm periods (Burn, 1988; Table S5). The values also decrease in discontinuous permafrost zones (Table S6), representing the decrease in areal extent of permafrost and preferential thaw in coarse-grained units.

### 3.3. Wedge ice model

Ice wedge cracking typically occurs when ~~the top of permafrost undergoes sustained cooling and~~ <sup>soil</sup> temperatures <sup>near the surface</sup> fall below -10 to -15 °C, ~~usually in late winter~~ (Allard and Kasper, 1998; Fortier and Allard, 2005; Kokelj et al., 2007a; O'Neill and Christiansen, 2018). Snow cover and winter air temperatures critically control these ground thermal conditions (Lachenbruch, 1962; Mackay, 1974, 1992). Both winter air temperatures and snow depths generally decrease northward from boreal forest to tundra (Atlas of Canada, 2010; Palmer et al., 2012). In tundra, snow cover properties are dominantly controlled by vegetation characteristics and site-scale topography (Essery and Pomeroy, 2004). Shrubs trap windblown snow, protecting it from densification and sublimation, which promotes thicker snow cover and warmer ground temperatures than in barren tundra (Liston et al., 2002; Sturm et al., 2001). The northward decrease in air temperature and snow depth result in an associated decline in ground temperatures (Burn and Kokelj, 2009; Smith et al., 2010).

There are few long-term records of ice-wedge cracking in Canada, but these generally indicate decreasing cracking frequency moving from tundra to forest environments in response to warmer ground temperatures (Kokelj et al., 2014). Observations by J. Ross Mackay provide a wealth of information from the western Canadian Arctic (Burn, 2015), and results from monitoring on Bylot Island, Nunavut, are also instructive (Fortier and Allard, 2005). In herb tundra on Bylot Island, cracking monitored at two ice wedges occurred in 4 (67%) and 5 (83%) out of six winters, with both wedges cracking in three winters (Fortier and Allard, 2005). In low shrub tundra at Garry Island, Northwest Territories, cracking frequency at one site over 12 years was 8-42% and at another 22-75% over 20 years. Ice-wedge cracking frequency in 1968-1973 at 10 sites decreased linearly with snow depth (Mackay, 1974, Fig. 19). At the Illisarvik drained lake basin on Richards Island, Northwest Territories, ice wedge development was rapid on the initially-barren drained lake bottom (Mackay, 1986). Cracking frequencies decreased as vegetation established and snow cover increased, and all cracking ceased when snow depths reached

about 0.6 m (Mackay, 1986; Mackay and Burn, 2002b). Near the tree line at Inuvik, Northwest Territories, no cracking was recorded at twelve locations in forest in 1980-1988 (Mackay, 1992). The growth of spruce trees in many of the troughs attested to infrequent recent cracking. Similarly, ice-wedge cracking is inactive in white spruce forests in eastern Mackenzie Delta (Kokelj et al., 2007a). Infrequent cracking during cold years led to the formation of thin ice veins in the boreal forest in central Yukon Territory since the 1950s (Burn, 1990). In Alaska, ice wedges are typically weakly active or inactive in forested areas of the discontinuous permafrost zone (Pewe, 1975; Jorgenson et al., 2008). However, it is unlikely that significant wedge ice accumulates in the northern boreal forest, since the recurrence interval of fires is commonly <150 years (Johnson, 1979; Larsen, 1997; Payette et al., 1989; Viereck, 1983). These environmental conditions cause the size of ice wedges and the density of polygonal terrain to decrease across the tundra-forest transition (Kokelj et al., 2014).

10 Wedge ice abundance is modelled over the 14 time steps. Ice accumulates over time as terrain becomes exposed following deglaciation or lake/marine recession. Based on available empirical data on ice wedge cracking and broad patterns of vegetation, snow cover, and ground temperature, we assume the rate of wedge ice growth is greatest in herb tundra, moderate in shrub and alpine tundra, and low in forest tundra (Table S7). Wedge ice accumulation is considered most rapid within herb tundra in thick, fine-grained sediments, where cold winter air temperatures and thin snow cover are conducive to frequent and deep thermal contraction cracking (Lachenbruch, 1962). Wedge ice remains preserved but ceases to accumulate in areas that transition from tundra to boreal forest biomes, as ground thermal conditions in forest are typically not favourable for ice-wedge cracking (Burn, 1990; Kokelj et al., 2007a, 2014; Table S7). Finally, the present-day permafrost distribution is used to model the differential melt of ice wedges in discontinuous permafrost depending on the surficial material (Table S8). The resulting accumulated numeric values are reclassified as high, medium, low, and negligible abundance using the quantile method (Table S9).

#### 4 Results

Modelled massive ice abundance mainly reflects the distribution of thick glaciogenic sediments in regions that have remained in herb and shrub tundra environments since deglaciation, and occur in the modern continuous permafrost zone (Fig. 2). High abundance occurs in four main areas 1) western Arctic islands, including Banks and Victoria islands, 2) the western Arctic mainland, 3) the central Canadian Shield, and 4) northwest Baffin Island. Areas of high massive ice abundance constitute about 3% of the continuous permafrost zone in Canada and areas of medium abundance about 9%.

Modelled segregated ice is widely distributed owing to the ubiquity of fine-grained surficial materials in northern Canada. High abundance occurs in areas covered by marine or lacustrine sediments that are in tundra of the continuous permafrost zone (Fig. 3). Areas of high abundance occupy about 4% of the continuous and 4% of the extensive discontinuous permafrost zones, respectively. Areas of medium segregated ice abundance are widespread, occupying about 22% of the continuous and 17% of the extensive discontinuous permafrost zones, respectively. These areas largely reflect the distribution of till derived from sedimentary bedrock, particularly in northwestern Canada, which may include a significant fine-grained

fraction. Paleovegetation distribution also influences segregated ice, particularly in the Mackenzie Valley of the western Arctic where Holocene treeline advance causes a modelled reduction in ice abundance.

Modelled wedge ice abundance largely reflects exposure time of unconsolidated sediments to cold climatic conditions. The pattern of deglaciation and Holocene environmental history thus strongly control the distribution. Abundance is high where herb and shrub tundra have persisted for long periods (ca. 13 ka), including the western Arctic islands and some areas of the western Arctic mainland and coast (Fig. 4). As with segregated ice, a corridor of negligible wedge ice abundance in the western Arctic is associated with Holocene tree line advance. Areas of high and medium wedge ice abundance comprise about 2% and 9% of the modern continuous permafrost zone, respectively. Wedge ice abundance is generally low and negligible in the discontinuous and isolated permafrost zones, reflecting the limited time that tundra conditions persisted following deglaciation in more southerly regions.

## 5 Discussion

### 5.1. Model assessment

The model validation process may include a number of techniques, but ‘validation’ ultimately depends whether the model behaviour seems reasonable to knowledgeable people given the stated model objectives and performance criteria (Riseborough et al., 2008; Rykiel, 1996). Our modelling objectives were to produce an updated depiction of ground ice in Canada, encourage questions that guide new ground ice investigations, and identify requirements to advance future modelling efforts. Systematic observations of different ground ice forms are still lacking from many areas, making quantitative validation techniques in most areas impossible. Therefore, we present comparisons between the model outputs, available field observations, and the ground ice mapping of Heginbottom et al. (1995). As more data become available or are compiled, continued scrutiny of the methodology, parameterization, and outputs will permit improvements through an iterative modelling approach (e.g., Overton, 1977), contributing to an improved understanding and depiction of ground ice in permafrost in North America.

#### 5.1.1. Massive ice

Areas with high modelled massive ice abundance correspond well with the distribution of large thaw slumps, which typically develop in areas underlain by thick layers of massive ice or icy sediments (Kokelj et al., 2017), helping validate the model in northwest Canada (Fig. 5). The model reproduces massive ice observed directly or interpreted from thaw slump mapping on Banks Island, Victoria Island, the western Arctic mainland, the central Canadian Shield, and Ellesmere Island (Fig. 5b; see Fig. S3 for specific locations mentioned throughout the text). Areas of high ice abundance are associated with hummocky till and moraine deposits that have remained in tundra and continuous permafrost during the Holocene. Field observations of massive ice from the discontinuous permafrost zone are lacking, as is indirect evidence in the form of large thaw slumps (Fig. 5b). The model also depicts massive ice in medium and lower abundance in other glacial terrain of the continuous permafrost zone that was not inundated during the Holocene. It is difficult to validate results in many of these areas due to the

lack of field evidence. Nonetheless, it seems reasonable that massive ice may remain preserved in other till and glaciofluvial deposits.

### 5.1.2. Segregated ice

Areas with high modelled segregated ice abundance occur in raised marine and glacial lake sediments, and correspond to observations of widespread shallow thaw lakes, lithalsas, palsas, and peat plateaus (Fig. 6). High segregated ice abundance is modelled in Old Crow Flats in Northern Yukon where there are about 2700 shallow thermokarst lakes with an average depth of <2 m (Turner et al., 2014). ~~Segregated and wedge ice is concentrated in the upper sediments (Matthews et al., 1990; Roy Leveillé and Burn, 2015, 2017), which is characteristic of epigenetic permafrost growth (French and Shur, 2010; Gilbert et al., 2018), and explains the shallow thaw lake depths.~~ <sup>In epigenetic permafrost,</sup> High segregated ice abundance is modelled in Hudson Bay Lowlands and is evident in the form of widespread palsas and peat plateaus in the uplifted fine-grained marine sediments (Kuhry, 2008; Payette, 2004). High abundance is also modelled around Umiujaq on eastern Hudson Bay, where both palsas and lithalsas are common (Allard and Seguin, 1987; Calmels et al., 2008b). Southwestern Baffin Island also includes high segregated ice abundance where shallow (< 2 m) thaw lakes and drained lake basins are widespread on the Great Plain of the Koukdjuak (Martini and Morrison, 2014).

High segregated ice abundance modelled on small parts of the Fosheim Peninsula on Ellesmere Island correspond to areas underlain by segregated ice and bodies of massive intrasedimental ice (Pollard, 2000). Robinson and Pollard (1998) attribute the massive ice to segregation during permafrost aggradation into fluvial sands and marine silt overlying unfrozen coarse strata with highly pressurized groundwater. These specific formation conditions following marine emergence are not considered in either the massive or segregated ice model, but the general ice conditions are nonetheless represented by the high modelled segregated ice abundance. Medium segregated ice abundance is modelled over much of the western Arctic mainland, Banks, and Victoria islands in till derived from sedimentary bedrock. These areas also include abundant shallow thaw lakes (Burn, 2002; Dallimore et al., 2000) and thaw slumps (e.g., Lantz and Kokelj, 2008). Further south in the discontinuous permafrost zone, small thaw slumps and active layer detachment slides occur in the Mackenzie Valley where segregated ice abundance is largely modelled as low or medium (e.g., Couture and Riopel, 2008).

### 5.1.3. Wedge ice

The modelled distribution of wedge ice generally corresponds to field and remote sensing observations of ice wedges and polygonal terrain. The size of ice wedges and the density of polygonal terrain increases across the forest-tundra transition in the western Arctic (Kokelj et al., 2014), and the wedge ice model reproduces this general pattern as an increase from negligible to high wedge ice abundance (Fig. 7). Areas of modelled negligible wedge ice abundance in forest-tundra generally correspond to small ice wedges observed only in organic soils. Low wedge ice abundance corresponds to small-to-moderate sized ice wedges observed in both mineral and organic soils in shrub tundra (Kokelj et al., 2014). Areas of medium ice wedge abundance correspond to medium-to-large ice wedges observed further north in dwarf-shrub tundra (Fig 7). Pollard and French (1980)

estimated that wedge ice on Richards Island constitutes about 12% of the upper 4.5 m of permafrost, where the modelled abundance is medium to high (Fig. 7a).

High wedge ice abundance is modelled over large areas of Banks and Victoria Island (Fig. 4). Evidence of abundant large ice wedges is available from imagery and from field investigations on Banks Island. Ice wedges may exceed 3 m in width and 10 m in depth, and comprise up to 15% of the volume of upper ground (French, 1974). The formation of large ice wedges in this environment is favoured due to the persistence of an Arctic climate for millennia. In addition, wedge growth may be facilitated where it occurs in massive ice, which has a high thermal contraction coefficient, promoting wide and deep thermal contraction cracking (Lachenbruch, 1962). A recent image analysis of Banks Island highlighted the widespread ~~distribution~~ <sup>degradation</sup> of large, ~~degrading~~ ice wedges and the resulting broad-scale increase in ponding in flatter terrain (Fraser et al., 2018).

Recent estimates on Fosheim Peninsula indicate that ice-wedge polygons cover about 50% of the terrain, and that wedge ice occupies between 1.4 to 5.9% volume of the upper 5.9 m of permafrost (Bernard-Grand'Maison and Pollard, 2018). In this region, wedge ice abundance is modelled mostly as low, with some small areas of medium abundance (Fig. 4). The modelled wedge ice abundance and field/imagery derived wedge volume estimates are thus generally consistent for Banks Island, Richards Island, and Fosheim Peninsula.

## 5.2. Comparison with previous mapping

The broad patterns of modelled massive, segregated, and wedge ice abundance are similar to those mapped by Heginbottom et al. (1995), but the modelled results are more spatially explicit and portray ground ice conditions more accurately in many regions. The modelled ground ice abundance was compared to the PMC by standardizing the legends and producing a difference map using a raster combination (Table 2; Fig. 8). The ice class on the PMC that includes “segregated ice, intrusive ice, reticulate ice veins, ice crystals and ice coatings on soil particles” was considered analogous to the modelled segregated ice in this paper, since reticulate veins and ice coatings on soil particles also form by segregation, and intrusive ice forms only under localized conditions. The comparison for each ice type is not exhaustive, but rather focuses on regions with significantly different assessed ice abundance: i.e., (1) where our models indicate high ground ice abundance and the PMC indicates low or none; (2) where the PMC indicates high ground ice abundance and our models indicate low or none (see ~~Table 2;~~ Fig. 8).

### 5.2.1. Massive ice

Both representations generally depict abundant massive ice on the western Arctic mainland and Banks and Victoria islands, but the model output is more spatially defined and more accurately reflects current knowledge of the distribution of massive ice and icy sediments (Fig. 2, 8a). For example, no massive ice is modelled on southeastern Victoria Island, where marine inundation is considered to have melted relict ice (Fig. 2, 8d). This interpretation is supported by the lack of large thaw slumps mapped in the region (Fig 5b; Kokelj et al., 2017). Similarly, the PMC indicates abundant massive ice over most of the Canadian Arctic Archipelago (CAA) islands northeast of Banks and Victoria islands (Fig. 8a, d). In contrast, the model indicates that massive ice is absent on most of these islands, as the surficial materials are regolith or colluvium and are thus

unlikely to include massive ice or icy sediment. In addition, many of the islands were partially or fully inundated following deglaciation. On the Great Plain of the Koukdjouk, western Baffin Island, the PMC indicates abundant massive ice. However, the region was also marine inundated, and the shallow depths and consistent shape of the lake basins there indicate thaw of uniformly distributed segregated ice restricted to upper sediments rather than of thicker massive ice bodies (Martini and Morrison, 2014). In the Peel Plateau region, areas of high and medium modelled massive ice abundance occur where widespread exposures have been observed directly and mapped using remotely-sensed imagery (Kokelj et al., 2015; Lacelle et al., 2015). In contrast, the PMC indicates that massive ice is absent or sparse in this region (Fig. 8a, d). The model indicates an absence of massive ice in Old Crow Flats, whereas the PMC indicates that it is abundant (Fig. 8d). The region includes abundant ice wedges, a thin layer of near-surface segregated ice, and resulting shallow thermokarst lakes (Labrecque et al., 2009; Roy-Leveillé and Burn, 2017), but evidence of massive ice is lacking. The past submergence of the area by glacial Lake Old Crow and associated deposition of thick glaciolacustrine sediments precludes the preservation of relict ice, so the modelled output is more appropriate. In the northern Mackenzie Valley region, the massive ice abundance is higher on the PMC than the model output (Fig 8d). Low, negligible, and no massive ice is indicated by the model due to the presence of different till units (hummocky, blanket, veneer), and reductions in modelled abundance due to Holocene tree line advance in the region. The large physiographic unit with abundant massive ice on the PMC extends south to areas with little evidence of massive ice in the form of large thaw slumps (Fig. 5b). In these examples the modelled distribution of massive ground ice is in better agreement with available empirical data and more spatially discrete than the portrayal on the PMC. Further empirical investigations are required to assess the model outputs in some areas, such as on Brodeur Peninsula on northwest Baffin Island and on the central Canadian Shield, where the modelled abundance is higher than on the PMC (Fig. 8d).

### 5.2.2. Segregated ice

The distribution of segregated ice is also broadly similar on the PMC and model output, with relatively high abundance portrayed over much of the western Arctic mainland and islands (Fig. 3, 8b). However, some key differences are evident (Figure 8e). For example, ice content is considered low-medium in Hudson Bay Lowlands on the PMC, whereas the model output indicates high abundance in the extensive fine-grained marine sediments (Fig. 8e). Smith and Burgess (2004) similarly mapped this region as having high thaw sensitivity due to high ground ice content. Given the abundance of peat plateaus and palsas in this region and the evident landscape change that has occurred due to recent ground ice melt (Payette, 2004), the high modelled segregated ice abundance is more appropriate. The PMC indicates a higher abundance of segregated ice than the model on many eastern and high Arctic islands (Fig. 8e). However, many of these areas are covered by colluvium, weathered regolith, or bedrock, which are not highly frost susceptible and thus likely contain relatively little excess ice. Similarly, high segregated ice abundance is indicated on the northeast Tuktoyaktuk coastlands on the PMC, whereas the model indicates a general absence (Fig 8e). The surficial materials in this area are largely eolian sand and sandy outwash that contain little segregated ice (Rampton, 1988b). Some small areas with frost susceptible lacustrine deposits are also present (Rampton, 1988b), but not mapped at the scale of surficial geology dataset used in the model. The PMC indicates high segregated ice

abundance in the Mackenzie Valley area south of treeline, where the modelled abundance is reduced to represent periodic thaw and loss of ice from the upper permafrost (Burn, 1988; Shur et al., 2005). This modelled pattern requires further investigation. The model indicates high or medium segregated ice abundance in many areas of the central Canadian Shield that include frost-susceptible sediments, whereas the PMC indicates low-medium or low ice content in the encompassing physiographic regions (Fig. 8e). The difference map in Figure 8e highlights how the surficial geology basemap leads to a more detailed depiction of segregated ground ice that accounts for the heterogeneity in frost susceptibility of surficial materials. The model depiction is an improvement in several regions, but further validation using field datasets is required in some regions to better assess the outputs.

### 5.2.3. Wedge ice

Broad patterns of wedge ice abundance are similar on the model output and the PMC, with areas of high abundance concentrated in the western Arctic (Fig. 4, 8c). However, the PMC indicates more wedge ice on many of the islands of the central and northern CAA (Fig. 8f). The modelled abundance on these islands is generally low or negligible because the substrate is dominantly thin, coarse-grained colluvium or weathered bedrock, which does not favour ice wedge development. Small areas of medium and high abundance are modelled near some coasts in fine-grained till and marine deposits. The lower modelled abundance on most of the islands is a more reasonable depiction, particularly considering the lack of polygonal terrain visible in imagery compared to Banks Island, where large ice wedges are widely distributed and the modelled abundance is high (Fraser et al., 2018). Abundant ice wedges are indicated on the PMC on southwest Baffin Island on the Great Plain of the Koukdjuak (Fig. 8c). In contrast, our model results indicate only negligible to low wedge ice abundance in the area, partly because the plain has only been terrestrially exposed for ca. 6 ka (Fig. 3). The modelled abundance better represents field conditions, as only small insipient ice wedges occur on the plain (Martini and Morrison, 2014). In the northern Mackenzie Valley and Mackenzie Delta regions, modelled wedge ice abundance is lower than indicated on the PMC due to the modelled decrease of wedge ice across the tundra-forest transition (Fig. 4, 8f). As indicated in Sect. 5.1.3., this pattern reproduces the observed southward decrease in polygonal terrain density and wedge width on the western Arctic mainland (Kokelj et al., 2014). Modelled wedge ice abundance is high or medium in the Peel Plateau region, but sparse or absent on the PMC. In this case, field observations suggest that the PMC better represents wedge ice conditions, as the distribution of polygonal ground on Peel Plateau is limited to small peatlands that occupy a small proportion of the overall landscape (S.V. Kokelj, personal communication, 2018). Sect. 5.3.2. discusses why the model likely over represents wedge ice in the region.

These comparisons highlight the limitations of representing ground ice conditions in large physiographic units that may include a range of surficial materials and landscape histories. Overall, the model outputs offer an improved representation of known ground ice conditions by accounting for specific surficial materials and considering the effects of broad-scale environmental processes. The apparent inaccuracies on the PMC in many areas necessarily impact the output of other broad-scale landscape assessments that use the ground ice distribution as input parameters, such as mapping of thermokarst landscapes and permafrost hazard potential (e.g., Nelson et al., 2001; Olefeldt et al., 2016).

### 5.3. Limitations

The presented models include several limitations and assumptions that originate from (1) input data validity, (2) conceptual validity, and (3) the calibration of input values (Rykiel, 1996). Nonetheless, the resulting ground ice distributions appear reasonable, recreating broad patterns from previous mapping, and improving the depiction in many regions.

#### 5 5.3.1. Input data validity

One of the main challenges of representing complex phenomena over large areas is the precision and accuracy of the source information. The surficial material dataset used in the models, though more spatially detailed than physiographic units used in previous mapping (Brown et al., 1997; Heginbottom et al., 1995) lacks precision and accuracy in some areas. The mapping by Fulton (1995) synthesized maps that were typically 1:50,000 to 1:250,000 scale. The map units for the national representation were compiled at 1:1,000,000 scale and then photographically reduced to 1:5,000,000 scale (Fulton, 1995). Small map units enclosed by a larger unit were removed, and small units between two larger units were attached to similar adjacent units (Fulton, 1995). In addition, many areas of Canada and particularly the Arctic remained unmapped at the time of compilation. In these areas, Fulton (1995) relied on available literature and assessments by experts to delineate surficial units. These deficiencies caused inaccuracy in the modelled results in some areas. For example, lithalsas are abundant in glaciolacustrine sediments along the northern shore of Great Slave Lake near Yellowknife, Northwest Territories (Wolfe et al., 2014). Segregated ice is modelled as either absent or negligible in much of this area because surficial materials are mapped as bedrock and till veneer. More recent mapping has properly identified the widespread glaciolacustrine sediments that host the many ice-cored features in the region (Stevens et al., 2017; Wolfe et al., 2014). Therefore, the model output could be improved by including updated surficial geology mapping. These data are becoming available in a consistent digital format through new mapping and conversions of existing maps by the Geological Survey of Canada (Deblonde et al., 2018; see [geoscan.nrcan.gc.ca/](http://geoscan.nrcan.gc.ca/)).

The generalized paleogeographic datasets, although fundamental to the model, are inherently limited and subject to scrutiny regarding the timing and spatial extent of the last glaciation, deglacial limits, lake and sea levels, and biome distributions. For example, the paleovegetation dataset of Dyke et al. (2004) has several limitations that affect model results. The biome distributions are based on a relatively large dataset of pollen sites, plant and terrestrial mammal macrofossils across northern North America (n = 4659), but these observations are most limited in modern herb, shrub, and forest tundra environments. Therefore, the interpretation of biomes and their limits are approximations, particularly in northern regions. Second, the biome distributions reflect climatic factors such as growing season length and the mean temperature of the warmest month, which are not direct analogues of ground thermal conditions. Climatic and vegetation conditions may vary significantly within each of the defined biomes, affecting ground thermal conditions controlling, for example, wedge ice development or the preservation of relict massive ice.



### 5.3.2. Conceptual validity

Conceptual validity refers to the justifiability of underlying theories and assumptions in the model that represent the system behaviour (Rykiel, 1996). For each model, the cause-effect relations and assumptions are explained in the methods section and supplementary material. Necessary assumptions in the expert system do not fully capture the complexity of conditions known to influence ground ice growth and decay. For example, the massive ice model does not deal with ice melt over time in tundra environments of the continuous permafrost zone resulting from erosional processes. Melt of relict ice may occur irrespective of climatic amelioration due to colluvial, fluvial, or coastal erosion processes, which are controlled by topography, site-scale conditions, and energy and mass transfers that are not represented in the models.

For the wedge ice model, complex relations between air temperature, snow and vegetation conditions, and ground temperature were simplified under the broad assumption that ice-wedge cracking frequency increases as air temperature and snow cover decrease from forest to herb tundra (e.g., Kokelj et al., 2014). Regional deviations in air temperature and snow accumulation controlled by synoptic weather patterns and orography were not considered, which may influence wedge ice abundance. For example, the model indicates areas of high wedge ice abundance on Peel Plateau, Northwest Territories, in fine-grained glacial sediments that have remained in herb and shrub tundra biomes for much of the Holocene. However, polygonal terrain is sparse in the region. Ice wedge development may be limited on Peel Plateau because winter ground temperatures in the uplands are relatively high, owing to strong winter air temperature inversions and relatively thick snow cover compared to shrub tundra north of latitudinal tree line (O'Neill et al., 2015), and these specific regional conditions are not captured in the model.

Finally, the models do not account for the difference in ground ice accumulation due to the mode of permafrost aggradation, i.e., epigenetic or syngenetic. Syngenetic and quasi-syngenetic permafrost, which forms contemporaneously with aggrading sediment and correspondingly, or organic cover, is commonly more enriched with ground ice than epigenetic permafrost (Shur, 1988; Shur et al., 2011; French and Shur, 2010). In Canada, this has implications to ground ice formation and preservation, particularly where surface organic matter has accumulated during the Holocene. The thermal properties of peat favour aggradation of the permafrost table and the development of thick layers of segregated ice (Burn, 2004; Zoltai and Tarnocai, 1971; Shur, 1988). In addition, the presence of a surface organic layer may preserve permafrost and underlying inactive ice wedges in environments that no longer support ice-wedge cracking (Shur and Jorgenson, 2007). National-scale datasets of contemporary peatland distribution and thickness are available (Tarnocai et al., 2011), but they do not depict the timing of peat initiation or accumulation over time. Therefore, we do not explicitly consider the important influence of peat accumulation in our models. However, peat accumulation is strongly associated with the hydraulic conductivity of the mineral substrate. Clays and silts have significantly lower hydraulic conductivity than coarser-grained materials, so peat forms preferentially over fine-grained deposits (Tarnocai et al., 2011). Thus, the higher ground ice values assigned to fine-grained lacustrine, marine, and sedimentary bedrock-derived till units indirectly account for the influence of surface organic matter on ice content and the preservation of permafrost. In addition, thick and widespread organic

deposits are included in the surficial geology dataset. Nonetheless, the accumulation of peat may be better incorporated in future modelling.

Loess and other aggrading fine-grained sediments may also include ice-rich syngenetic permafrost (Kanevskiy et al., 2011). However, the distribution of loess is limited in Canada and in permafrost regions mainly restricted to Yukon in areas with valley train glaciers (Sweeney and Smalley, 1988). Other deposit types, such as aggrading fine-grained colluvium or alluvial fans are not differentiated at the scale of the surficial geology dataset, so syngenetic ground ice accumulation in these settings is not represented in the models.

### 5.3.3. Input value calibration

Calibration includes the adjustment of model parameters to improve agreement between model outputs and observations. The development of the models was an iterative process that included multistage assessments of outputs and small adjustments as knowledge of the mapped surficial material units, paleovegetation distribution significance, and current ground ice conditions was gained. The assignment of values for surficial material units benefitted from conversations with experts on the surficial geology of northern Canada (D.E. Kerr, personal communication, 2017 & 2018), and examination of map legends from larger-scale surficial geology maps. Volumetric estimates of ground ice, themselves derived by upscaling from relatively little quantitative field data, are available from only a few areas in Canada, including Richards Island, Banks Island, and Fosheim Peninsula (Bernard-Grand'Maison and Pollard, 2018; Couture and Pollard, 1998; French, 1974; Pollard and French, 1980). Therefore, there is insufficient field data to meaningfully calibrate model parameters and quantitatively validate the outputs. It is for this reason that we maintain qualitative descriptors for the ground ice abundance rather than numeric estimates in the map legends.

20

### 5.4. Directions for ground ice modelling and mapping

Detection and mapping of ground ice over large areas remains challenging. Ground ice volume measurements are required from more areas in Canada to improve validation of small-scale models. Direct observations are only possible at limited exposures and by coring, both of which are logistically demanding. Indirect ground-based geophysical methods such as ground penetrating radar and electrical resistivity tomography can be used to detect ice bodies, but are only applicable in site-scale investigations (Hinkel et al., 2001; Kneisel et al., 2008). Complementary geophysical techniques may allow differentiation and mapping of massive ice, wedge ice, and icy sediments (De Pascale et al., 2008), but accurate volumetric determinations are not yet possible. Because of their distinct polygonal surface expression, volume estimates of ice wedges can be derived using high-resolution imagery (Bernard-Grand'Maison and Pollard, 2018; Ulrich et al., 2014), but their accuracy ultimately depends on field measurements of ice wedge widths and depths. Air- and spaceborne optical, LiDAR, and D-InSAR techniques allow characterization of thermokarst terrain and processes, offering indirect insights into ground ice conditions (Kääb, 2008; Kokelj and Jorgenson, 2013). Despite these significant recent advances in geophysical and remote sensing techniques in permafrost

30

regions, the lack of assembled data on ground ice and volumetric estimates from different areas in Canada remains a key challenge in assessing the validity of small-scale ground ice models. The compilation of existing ground ice information and new field data from poorly characterized areas will improve calibration and validation of future model outputs.

Combining outputs produced using multiple techniques and perspectives may lead to further improvements to ground ice modelling (e.g., Silver, 2012). For example, pingos identified using remote-sensing techniques could be added as a point data layer. The depiction of deeper massive ice or icy sediment could be improved by accounting for stratigraphic configurations as opposed to surficial cover only. Further modelling efforts will benefit from emerging updated surficial geology mapping in a consistent digital format. The paleogeographic approach presented here may also be improved by incorporating revised glacial boundaries and other updated paleoenvironmental information (e.g., Lakeman and England, 2013). Alternate or updated information on permafrost distribution (e.g., Gruber, 2012) could also be utilized, and patterns of ground ice loss could be investigated with projections of future permafrost loss (Chadburn et al., 2017).

The results contribute an improvement in small-scale permafrost mapping for Canada, which has remained unchanged for over two decades. The mapping is of practical relevance given recent widespread circumpolar landscape changes that have already been observed in association with ground ice melt (Fraser et al., 2018; Jorgenson et al., 2006; Liljedahl et al., 2016; Rudy et al., 2017). Improved ground ice data layers are valuable for broad-scale Earth System modelling, and other derived synthetic mapping products. In addition, the modelling approach may also enable depictions of ground ice in past periglacial environments of North America, and thus indicate where features such as ice-wedge casts may occur today (Gao, 2005; Morgan, 1972). The discrepancies highlighted between mapping in this paper and by Heginbottom et al. (1995) underscore the need for caution when interpreting outputs from previous models that have used the ground ice information as input parameters.

## 6 Conclusions

New modelling using a paleogeographic approach depicts the distribution of relict massive ice and icy sediment, segregated ice, and wedge ice in permafrost. The predictions are broadly consistent with observations from empirical studies. Massive ice is modelled in high abundance over 3% of the continuous permafrost zone in Canada, and is restricted to thick glacial sediment that has remained in cold tundra environments during the Holocene. High segregated ice abundance is modelled over 4% of the continuous and 4% of the discontinuous permafrost zone in fine-grained marine and glacial lake sediments. High wedge ice abundance is modelled over 2% of the continuous permafrost zone, mainly on Banks and Victoria islands and the western Arctic coast. The distribution of high wedge ice abundance reflects the time available for ice-wedge cracking in tundra environments since terrain exposure following glaciation or submergence. The presented model outputs offer improved spatial detail and seemingly improved accuracy in several areas compared to previous ground ice mapping of Canada. This has potential implications to the validity of models that have used the Heginbottom et al. (1995) ground ice mapping as input

parameters. This study has identified the need for further compilation of ground ice information for the purposes of calibrating and validating small-scale ground ice models.

## **7 Data availability**

5 The datasets used in this paper are referenced and available online, and model parameter values are in the supplemental material.

## **8 Author contribution**

SAW conceived the modelling approach. SAW, HBO, and CD contributed to modifications to the models. HBO and SAW prepared the manuscript. CD operationalized the models in the geographic information system. CD and HBO produced cartographic outputs.

## **10 9 Acknowledgements**

The work was supported by Transport Canada and Natural Resources Canada's Postdoctoral Recruitment Program. The paper is Natural Resources Canada contribution #20180186 to the Climate Change Geoscience Program. Geographic information system support from R. Parker is gratefully acknowledged. The manuscript has benefitted from helpful comments and suggestions from S.L. Smith, S.V. Kokelj, D.E. Kerr, R.H. Fraser, and R. Smith. Discussions with D.E. Kerr regarding the surficial geology of northern Canada are gratefully appreciated.

15

**Table 1. Examples of surficial material units, soil texture, and resulting assessment of frost susceptibility.**

| Surficial material            | Soil texture                                                                           | Frost susceptibility |
|-------------------------------|----------------------------------------------------------------------------------------|----------------------|
| Mo: Marine offshore           | Dominantly silt and clay (Geological Survey of Canada, 2014)                           | High                 |
| A: Alluvial undifferentiated  | Silt, sand, clay, and gravel (Geological Survey of Canada, 2014)                       | Medium               |
| C: Colluvial undifferentiated | Blocks, rubble with sand, and silt with minor clay (Geological Survey of Canada, 2014) | Low                  |
| Wv: Weathered regolith veneer | Rubble to blocky felsenmeer (Geological Survey of Canada, 2014)                        | Negligible           |

**5 Table 2. Raster reclassification used to produce the ground ice abundance difference map between the Permafrost map of Canada (PMC) (Heginbottom et al., 1995) and the models (M).**

| Reclassified value | Original map legend |                     |                   |
|--------------------|---------------------|---------------------|-------------------|
|                    | PMC massive, wedge  | PMC segregated      | M (All ice types) |
| <b>High (2)</b>    | Abundant            | High, Med-high, Med | High, Medium      |
| <b>Low (1)</b>     | Sparse              | Low-Med, Low        | Low, Negligible   |
| <b>None (0)</b>    | Absent              | Nil-Low, None       | None              |

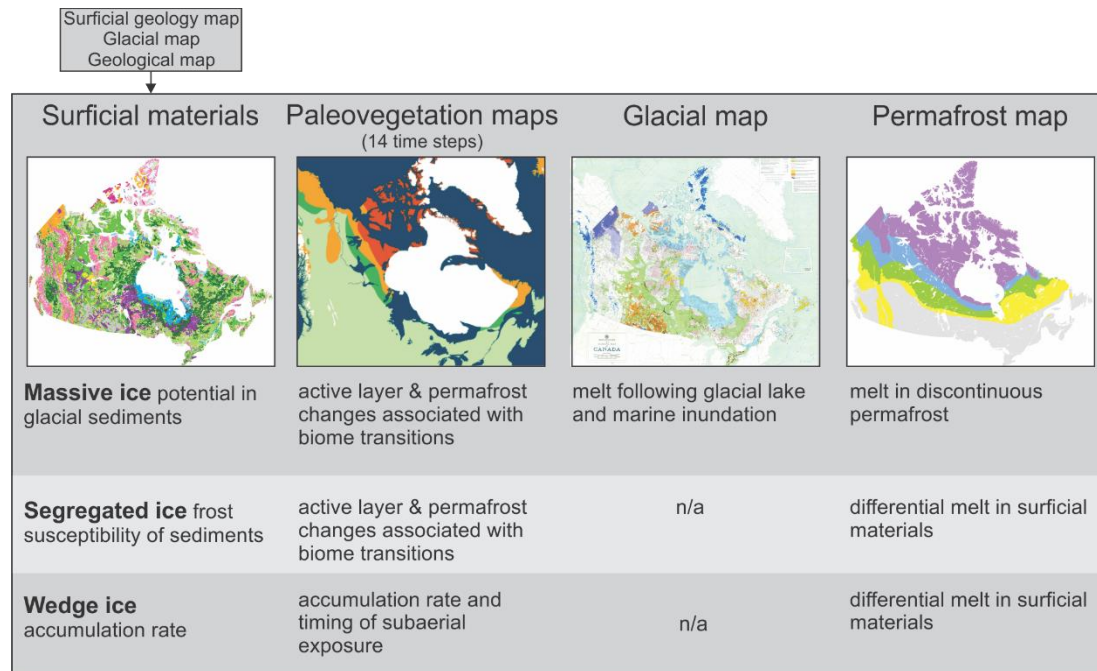

**Figure 1. General model framework indicating datasets used and processes represented for the three ground ice types.**

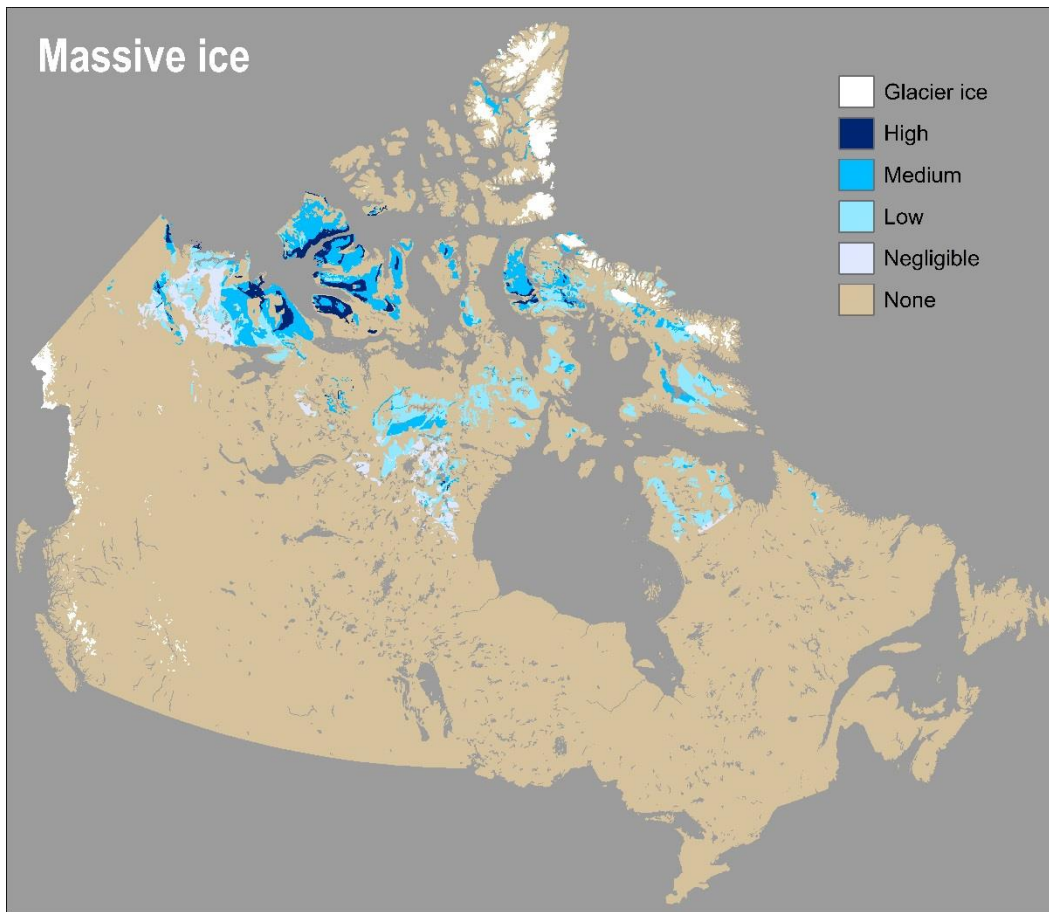

**Figure 2. Modelled massive ice abundance.**

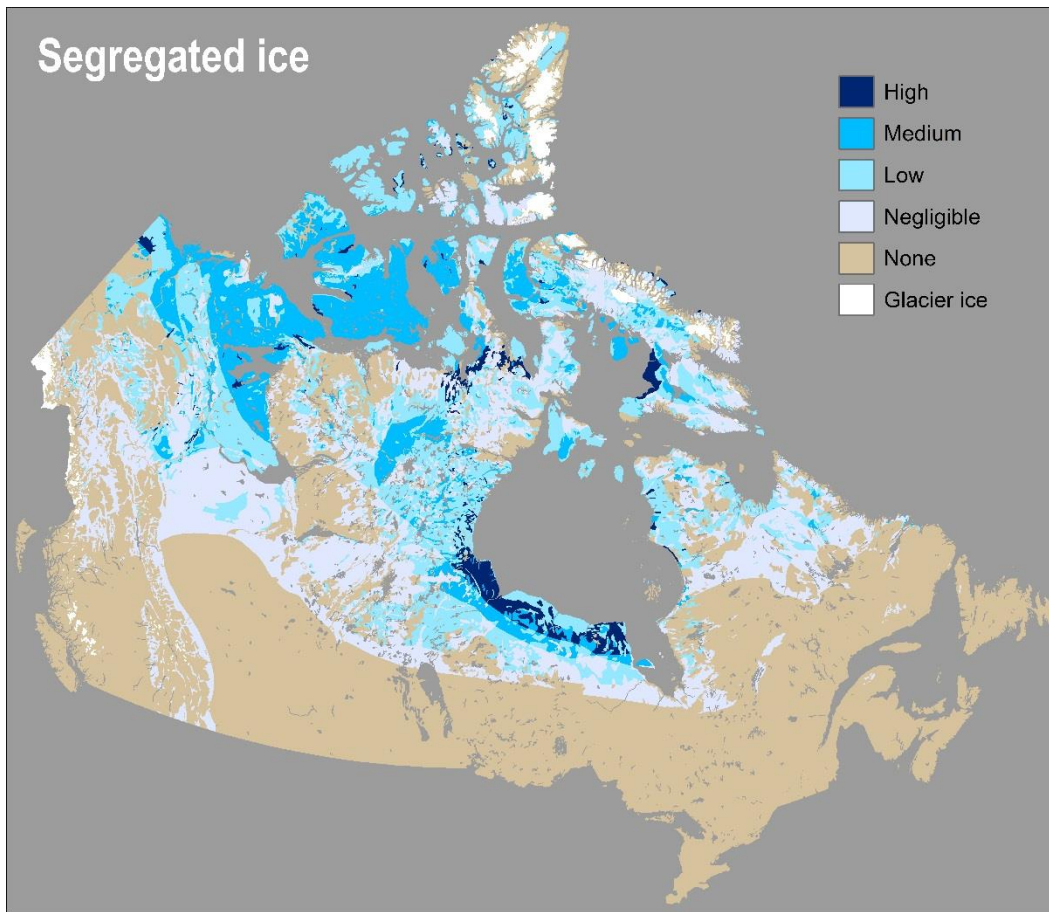

**Figure 3. Modelled segregated ice abundance.**

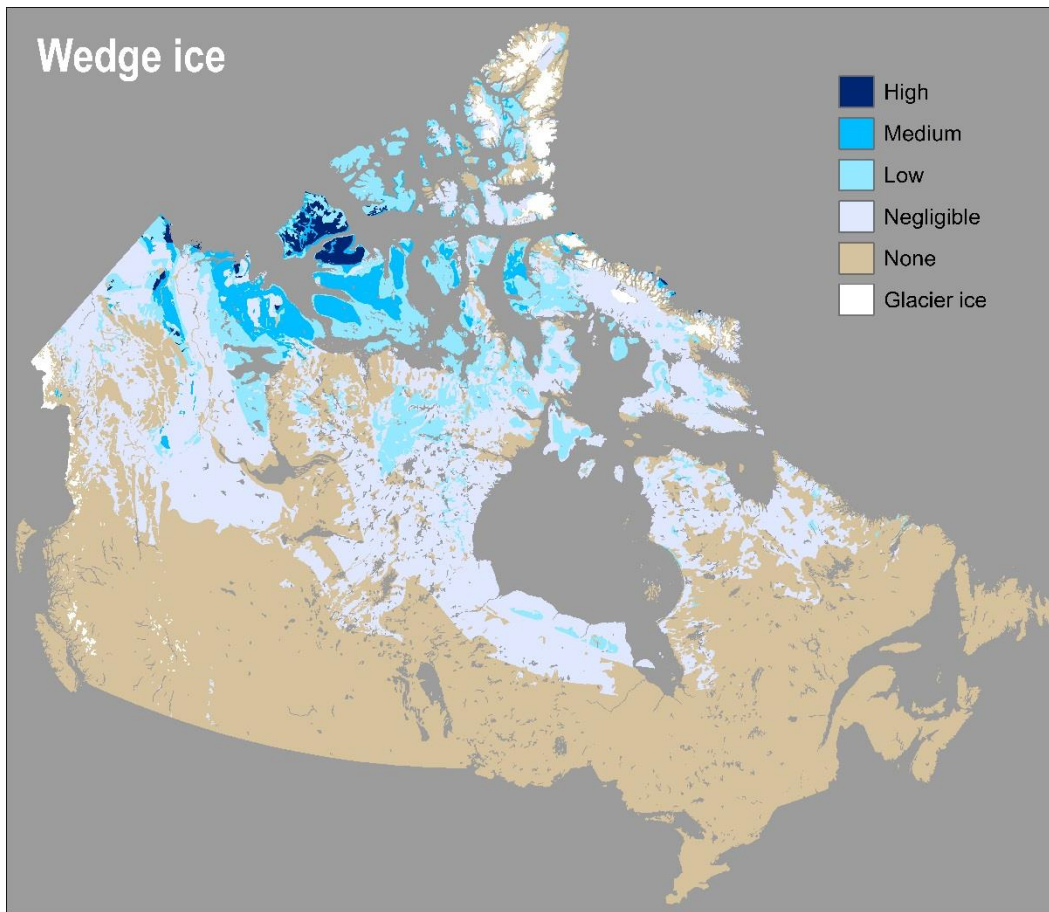

**Figure 4. Modelled wedge ice abundance.**



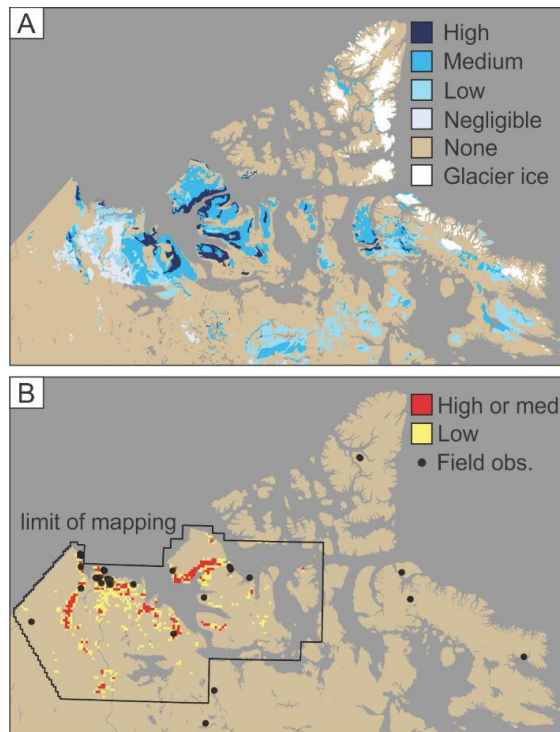

Figure 5. a) Modelled abundance of massive ice and; b) abundance of large (>1 ha) thaw slumps in northwest Canada (Kokelj et al., 2017; Segal et al., 2016), and field observations of massive ice from the literature (Table S3).

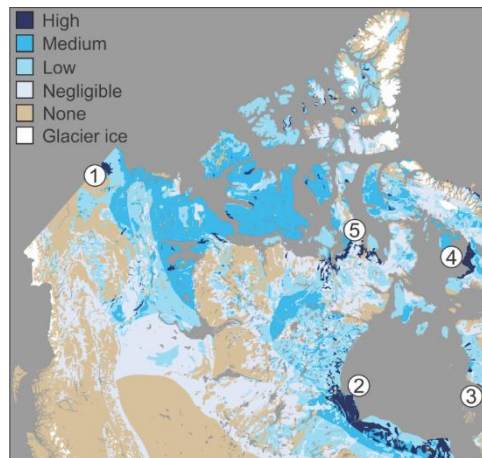

- 5 Figure 6. Modelled abundance of segregated ice. Old Crow Basin [1] is characterized by widespread excess-ice in fine-grained lacustrine sediments and an abundance of shallow thermokarst lakes. Within the Hudson Bay Lowlands [2], areas with high segregated ice abundance include extensive raised peat plateaus. Lithalsas are widespread in raised marine sediments at Umijuq [3]. The Great Plain of the Koukdjuak [4] and southern Boothia Peninsula [5] also include fine-grained uplifted marine sediments, and shallow thaw lakes are abundant in both regions.

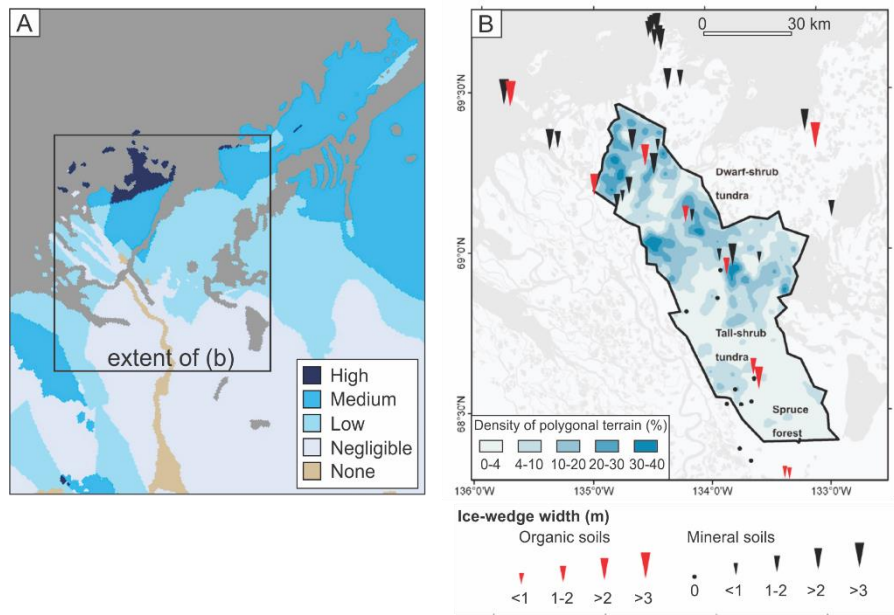

**Figure 7. Comparison of (a) modelled wedge ice abundance to (b) wedge widths and the density of polygonal terrain in the western Canadian Arctic (modified from Kokelj et al., 2014, Fig. 6).**

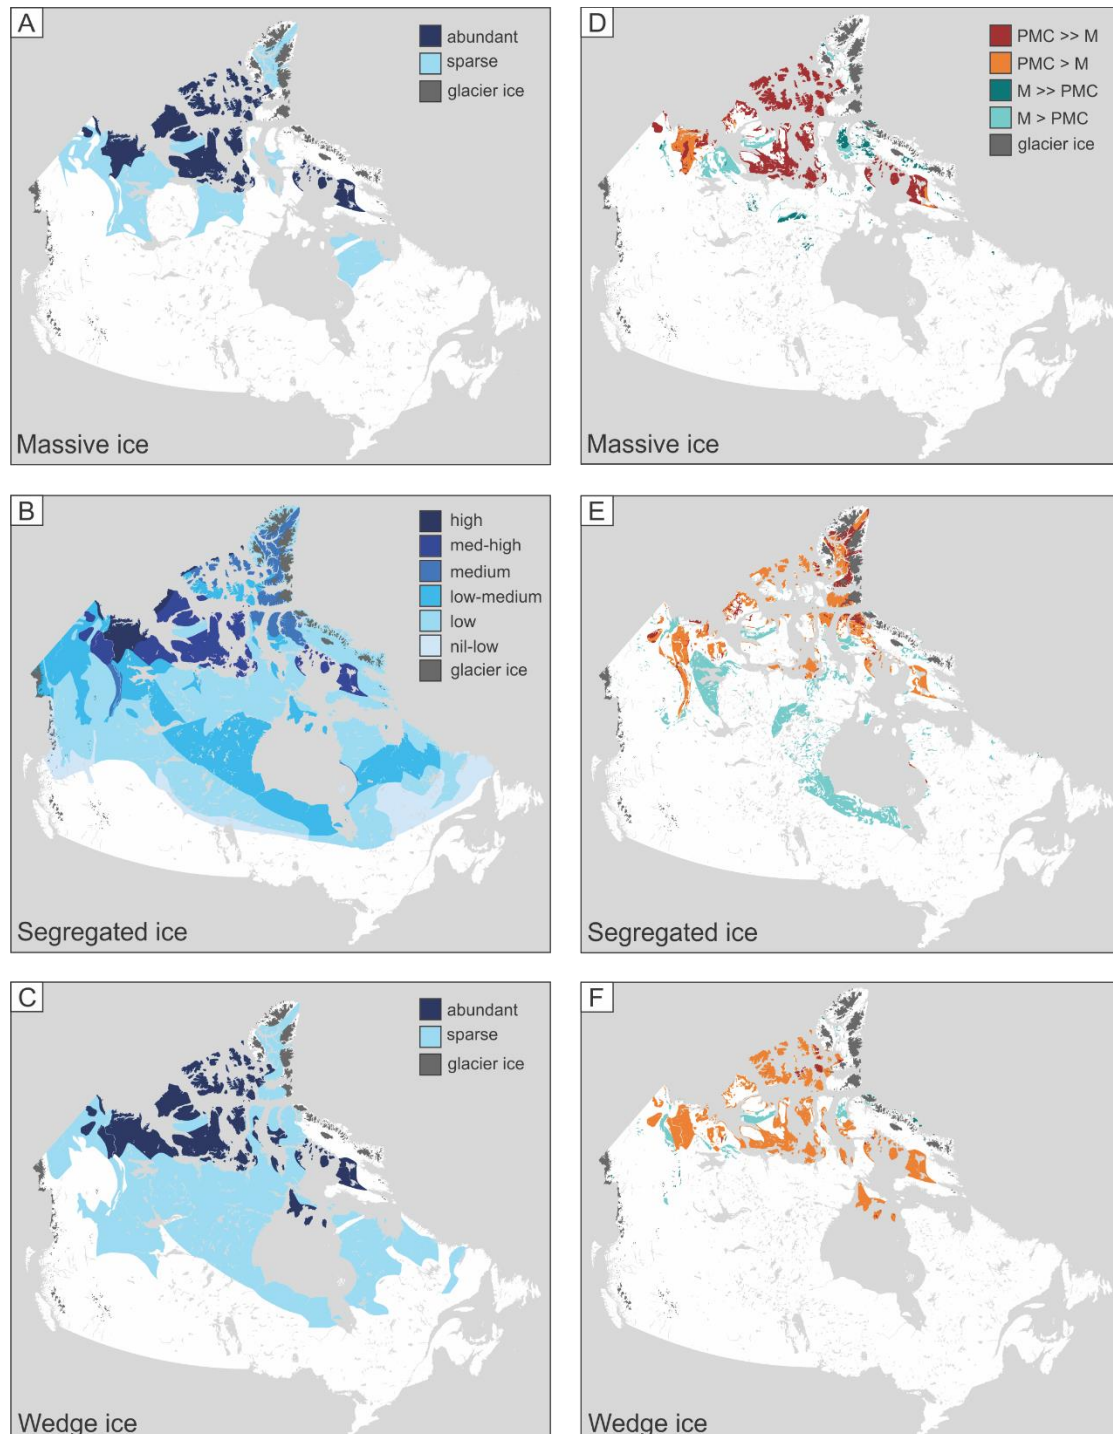

Figure 8. The Permafrost map of Canada (PMC) depictions of (a) massive ice, (b) segregated and intrusive ice, and (c) wedge ice (modified from Heginbottom et al., 1995); Comparison between the PMC and the models (M). PMC >> M indicates, for example, that the reclassified relative ground ice abundance on the PMC is 'high' and the modelled abundance is 'none'. M > PMC indicates the reclassified ground ice abundance is 'high' on the model output and 'low' on the PMC. See Table 2 and text.

5

- Allard, M. and Kasper, J. N.: Temperature conditions for ice wedge cracking: field measurements from Salluit, northern Québec, in *Proceedings of the 7th International Permafrost Conference*, vol. 57, pp. 5–11, Centre d'études nordiques, Université Laval, Québec City, Canada., 1998.
- 5 Allard, M. and Seguin, M. K.: The Holocene evolution of permafrost near the tree line, on the eastern coast of Hudson Bay (northern Quebec), *Can. J. Earth Sci.*, 24(11), 2206–2222, doi:10.1139/e87-209, 1987.
- Allard, M., Caron, S. and Bégin, Y.: Climatic and ecological controls on ice segregation and thermokarst: The case history of a permafrost plateau in Northern Quebec, *Permafrost Periglac.*, 7(3), 207–227, doi:10.1002/(SICI)1099-1530(199609)7:3<207::AID-PPP219>3.0.CO;2-4, 1996.
- 10 Atlas of Canada: Average maximum snow depth, Reference Outline Map Series 6355, Scale 1:7,500,000, Natural Resources Canada, Ottawa, ON, Canada., 2010.
- Bernard-Grand'Maison, C. and Pollard, W.: An estimate of ice wedge volume for a high Arctic polar desert environment, Fosheim Peninsula, Ellesmere Island, *Cryosphere Discuss.*, 1–28, doi:10.5194/tc-2018-29, 2018.
- Bostock, H. S.: Physiographic regions of Canada, Map 1254A, Scale 1:5,000,000, Geological Survey of Canada, Ottawa, ON, Canada., 1970.
- 15 Brown, J., Ferrians, O. J., Heginbottom, J. A. and Melnikov, E. S.: Circum-Arctic map of permafrost and ground-ice conditions, Circum-Pacific Map Series CP-45, Scale 1:10,000,000, U.S. Geological Survey., 1997.
- Burn, C. R.: The development of near-surface ground ice during the Holocene at sites near Mayo, Yukon Territory, Canada, *J. Quat. Sci.*, 3(1), 31–38, doi:10.1002/jqs.3390030106, 1988.
- 20 Burn, C. R.: Implications for palaeoenvironmental reconstruction of recent ice-wedge development at Mayo, Yukon territory, *Permafrost Periglac.*, 1(1), 3–14, doi:10.1002/ppp.3430010103, 1990.
- Burn, C. R.: The response (1958-1997) of permafrost and near-surface ground temperatures to forest fire, Takhini River valley, southern Yukon Territory, *Can. J. Earth Sci.*, 35(2), 184–199, doi:10.1139/e97-105, 1998.
- Burn, C. R.: Tundra lakes and permafrost, Richards Island, western Arctic coast, Canada, *Can. J. Earth Sci.*, 39(8), 1281–1298, doi:10.1139/e02-035, 2002.
- 25 Burn, C. R.: The thermal regime of cryosols, in *Cryosols*, pp. 391–413, Springer, Berlin, Heidelberg., 2004.
- Burn, C. R.: The geocryological bibliography of J. Ross Mackay (1915-2014), in *Proceedings, 68th Canadian Geotechnical Conference and 7th Canadian Permafrost Conference*, pp. 1–7, Canadian Geotechnical Society, Richmond, BC, Canada., 2015.
- Burn, C. R. and Kokelj, S. V.: The environment and permafrost of the Mackenzie Delta area, *Permafrost Periglac.*, 20(2), 83–105, doi:10.1002/ppp.655, 2009.
- 30 Burn, C. R. and Lewkowicz, A. G.: Retrogressive thaw slumps, *Can. Geogr.*, 34(3), 273–276, doi:10.1111/j.1541-0064.1990.tb01092.x, 1990.
- Calmels, F., Allard, M. and Delisle, G.: Development and decay of a lithalsa in Northern Québec: A geomorphological history, *Geomorphology*, 97(3–4), 287–299, doi:10.1016/j.geomorph.2007.08.013, 2008a.

- Calmels, F., Delisle, G. and Allard, M.: Internal structure and the thermal and hydrological regime of a typical lithalsa: significance for permafrost growth and decay, *Can. J. Earth Sci.*, 45(1), 31–43, doi:10.1139/e07-068, 2008b.
- Chadburn, S. E., Burke, E. J., Cox, P. M., Friedlingstein, P., Hugelius, G. and Westermann, S.: An observation-based constraint on permafrost loss as a function of global warming, *Nature Climate Change*, 7(5), 340–344, doi:10.1038/nclimate3262, 2017.
- 5 Chamberlain, E. J.: Frost susceptibility of soil, review of index tests, CRREL-81-2, Cold Regions Research and Engineering Laboratory, Hanover, NH, USA., 1981.
- Cheng, G.: The mechanism of repeated-segregation for the formation of thick layered ground ice, *Cold Reg. Sci. Technol.*, 8(1), 57–66, doi:10.1016/0165-232X(83)90017-4, 1983.
- 10 Coulombe, S., Fortier, D., Shur, Y. L., Kanevskiy, M. and Lacelle, D.: Cryofacies and cryostructures of massive ice found on Bylot Island, Nunavut, in *Proceedings, 68th Canadian Geotechnical Conference and 7th Canadian Permafrost Conference*, pp. 1–8, Canadian Geotechnical Society, Richmond, BC, Canada., 2015.
- Coulombe, S., Fortier, D., Lacelle, D., Kanevskiy, M. and Shur, Y.: Origin, burial and preservation of late Pleistocene-age glacier ice in Arctic permafrost (Bylot Island, NU, Canada), *Cryosphere Discuss.*, 1–24, doi:10.5194/tc-2018-114, 2018.
- 15 Couture, N. and Pollard, W. H.: An assessment of ground ice volume near Eureka, Northwest Territories, in *Proceedings of the 7th International Permafrost Conference*, pp. 195–200, Centre d'études nordiques, Université Laval, Québec City, Canada., 1998.
- Couture, R. and Riopel, S.: Landslide inventory along a proposed gas pipeline between Inuvik and Tulita, Mackenzie Valley, Northwest Territories, Open File 5740, Geological Survey of Canada, Ottawa, ON, Canada., 2008.
- 20 Dallimore, A., Schröder-Adams, C. J. and Dallimore, S. R.: Holocene environmental history of thermokarst lakes on Richards Island, Northwest Territories, Canada: thecamoebians as paleolimnological indicators, *J. Paleolimnol.*, 23(3), 261–283, 2000.
- Dallimore, S. R. and Wolfe, S. A.: Massive ground ice associated with glaciofluvial sediments, Richards Island, NWT, Canada, in *Proceedings of the 5th International Conference on Permafrost*, pp. 132–138, Tapir, Trondheim, Norway., 1988.
- 25 De Pascale, G. P., Pollard, W. H. and Williams, K. K.: Geophysical mapping of ground ice using a combination of capacitive coupled resistivity and ground-penetrating radar, Northwest Territories, Canada, *J. Geophys. Res. Earth Surf.*, 113(F2), doi:10.1029/2006JF000585, 2008.
- Deblonde, C., Cocking, R. B., Kerr, D. E., Campbell, J. E., Eagles, S., Everett, D., Huntley, D. H., Inglis, E., Parent, M., Plouffe, A., Robertson, L., Smith, I. R. and Weatherston, A.: Surficial Data Model: the science language of the integrated Geological Survey of Canada data model for surficial geology maps, Open File 8236, Geological Survey of Canada, Ottawa, ON, Canada., 2018.
- 30 Dyke, A. S. and Savelle, J. M.: Major end moraines of Younger Dryas age on Wollaston Peninsula, Victoria Island, Canadian Arctic: implications for paleoclimate and for formation of hummocky moraine, *Can. J. Earth Sci.*, 37(4), 601–619, doi:10.1139/e99-118, 2000.
- Dyke, A. S., Moore, A. and Robertson, L.: Deglaciation of North America, Open File 1574, Geological Survey of Canada, Ottawa, ON, Canada., 2003.
- 35 Dyke, A. S., Giroux, D. and Robertson, L.: Paleovegetation maps of northern North America, 18 000 to 1000 BP, Open File 4682, Geological Survey of Canada, Ottawa, ON, Canada., 2004.

- Essery, R. and Pomeroy, J.: Vegetation and topographic control of wind-blown snow distributions in distributed and aggregated simulations for an Arctic tundra basin, *J. Hydrometeorol.*, 5(5), 735–744, doi:10.1175/1525-7541(2004)005<0735:VATCOW>2.0.CO;2, 2004.
- Evans, D. J. A.: *Glacial Landscapes*, Arnold, London, UK., 2003.
- 5 Evans, D. J. A.: Controlled moraines: origins, characteristics and palaeoglaciological implications, *Quat. Sci. Rev.*, 28(3–4), 183–208, doi:10.1016/j.quascirev.2008.10.024, 2009.
- Fortier, D. and Allard, M.: Frost-cracking conditions, Bylot Island, eastern Canadian Arctic archipelago, *Permafrost Periglac.*, 16(2), 145–161, doi:10.1002/ppp.504, 2005.
- Fortier, D., Allard, M. and Shur, Y.: Observation of rapid drainage system development by thermal erosion of ice wedges on  
10 Bylot Island, Canadian Arctic Archipelago, *Permafrost Periglac.*, 18(3), 229–243, doi:10.1002/ppp.595, 2007.
- Fraser, R., Kokelj, S. V., Lantz, T. C., McFarlane-Winchester, M., Olthof, I. and Lacelle, D.: Climate sensitivity of High Arctic permafrost terrain demonstrated by widespread ice-wedge thermokarst on Banks Island, *Remote Sens.*, 10, 954, doi:https://doi.org/10.3390/rs10060954, 2018.
- French, H. and Shur, Y.: The principles of cryostratigraphy, *Earth-Sci. Rev.*, 101(3–4), 190–206,  
15 doi:10.1016/j.earscirev.2010.04.002, 2010.
- French, H. M.: Active thermokarst processes, Eastern Banks Island, Western Canadian Arctic, *Can. J. Earth Sci.*, 11(6), 785–794, doi:10.1139/e74-078, 1974.
- French, H. M. and Harry, D. G.: Nature and origin of ground ice, Sandhills Moraine, southwest Banks Island, Western Canadian Arctic, *J. Quat. Sci.*, 3(1), 19–30, doi:10.1002/jqs.3390030105, 1988.
- 20 French, H. M. and Harry, D. G.: Observations on buried glacier ice and massive segregated ice, western Arctic coast, Canada, *Permafrost Periglac.*, 1(1), 31–43, doi:10.1002/ppp.3430010105, 1990.
- Fritz, M., Wetterich, S., Meyer, H., Schirmer, L., Lantuit, H. and Pollard, W. H.: Origin and characteristics of massive ground ice on Herschel Island (western Canadian Arctic) as revealed by stable water isotope and Hydrochemical signatures, *Permafrost Periglac.*, 22(1), 26–38, doi:10.1002/ppp.714, 2011.
- 25 Fulton, R. J.: Quaternary geology of the Canadian interior plains, in *Quaternary Geology of Canada and Greenland*; by Fulton, R. J. (ed.); *Geology of Canada Series no. 1*, Geological Survey of Canada, Ottawa, ON, Canada., 1989.
- Fulton, R. J.: *Surficial materials of Canada*, “A” Series Map 1880A, Scale 1:5,000,000, Natural Resources Canada, Ottawa, ON, Canada., 1995.
- Gao, C.: Ice-wedge casts in Late Wisconsinan glaciofluvial deposits, southern Ontario, Canada, *Can. J. Earth Sci.*, 42(12),  
30 2117–2126, doi:10.1139/e05-072, 2005.
- Geological Survey of Canada: *Surficial geology of Canada*, Canadian Geoscience Map 195, Scale 1:5,000,000, Natural Resources Canada, Ottawa, ON, Canada., 2014.
- Gilbert, G. L., Kanevskiy, M. and Murton, J. B.: Recent Advances (2008-2015) in the Study of Ground Ice and Cryostratigraphy, *Permafrost Periglac.*, 27(4), 377–389, doi:10.1002/ppp.1912, 2016.

- Gilbert, G. L., O'Neill, H. B., Nemeč, W., Thiel, C., Christiansen, H. H. and Buylaert, J.-P.: Late Quaternary sedimentation and permafrost development in a Svalbard fjord-valley, Norwegian high Arctic, *Sedimentology*, doi:10.1111/sed.12476, 2018.
- Gruber, S.: Derivation and analysis of a high-resolution estimate of global permafrost zonation, *Cryosphere*, 6(1), 221–233, doi:10.5194/tc-6-221-2012, 2012.
- 5 Hamilton, T. D., Ager, T. A. and Robinson, S. W.: Late Holocene ice wedges near Fairbanks, Alaska, USA: environmental setting and history of growth, *Arct. Alp. Res.*, 15(2), 157–158, 1983.
- Heginbottom, J. A. and Dubreuil, M.-A.: A new permafrost and ground ice map for the National Atlas of Canada, in *Proceedings of the 6th International Permafrost Conference*, vol. 1, pp. 255–260, South China University of Technology Press, Beijing, China., 1993.
- 10 Heginbottom, J. A., Dubreuil, M.-A. and Harker, P. A. C.: Permafrost - Canada, National Atlas of Canada MCR 4177, Scale 1:7,500,000, Department of Energy, Mines and Resources Canada., 1995.
- Hinkel, K. M., Doolittle, J. A., Bockheim, J. G., Nelson, F. E., Paetzold, R., Kimble, J. M. and Travis, R.: Detection of subsurface permafrost features with ground-penetrating radar, Barrow, Alaska, *Permafrost and Periglacial Processes*, 12(2), 179–190, doi:10.1002/ppp.369, 2001.
- 15 Hopkins, D. M.: Thaw lakes and thaw sinks in the Imuruk Lake area, Seward Peninsula, Alaska, *J. Geol.*, 57(2), 119–131, doi:10.1086/625591, 1949.
- Johnson, E. A.: Fire recurrence in the subarctic and its implications for vegetation composition, *Can. J. Bot.*, 57(12), 1374–1379, doi:10.1139/b79-171, 1979.
- Jones, B. M., Grosse, G., Hinkel, K. M., Arp, C. D., Walker, S., Beck, R. A. and Galloway, J. P.: Assessment of pingo distribution and morphometry using an IfSAR derived digital surface model, western Arctic Coastal Plain, Northern Alaska, *Geomorphology*, 138(1), 1–14, doi:10.1016/j.geomorph.2011.08.007, 2012.
- 20 Jorgenson, M. T., Shur, Y. L. and Pullman, E. R.: Abrupt increase in permafrost degradation in Arctic Alaska, *Geophys. Res. Lett.*, 33(2), doi:10.1029/2005GL024960, 2006.
- Jorgenson, M. T., Yoshikawa, K., Kanevskiy, M., Shur, Y. L., Romanovsky, V. E., Marchenko, S., Grosse, G., Brown, J. and  
25 Jones, B.: Permafrost characteristics of Alaska, in *Proceedings of the 9th International Conference on Permafrost*, vol. 29, pp. 121–122, University of Alaska, Fairbanks, USA., 2008.
- Kääb, A.: Remote sensing of permafrost-related problems and hazards, *Permafrost Periglac.*, 19(2), 107–136, doi:10.1002/ppp.619, 2008.
- Kanevskiy, M., Shur, Y., Fortier, D., Jorgenson, M. T. and Stephani, E.: Cryostratigraphy of late Pleistocene syngenetic  
30 permafrost (yedoma) in northern Alaska, Itkillik River exposure, *Quat. Res.*, 75(03), 584–596, doi:10.1016/j.yqres.2010.12.003, 2011.
- Kanevskiy, M., Shur, Y., Jorgenson, M. T., Ping, C.-L., Michaelson, G. J., Fortier, D., Stephani, E., Dillon, M. and Tumskoy, V.: Ground ice in the upper permafrost of the Beaufort Sea coast of Alaska, *Cold Reg. Sci. Technol.*, 85, 56–70, doi:10.1016/j.coldregions.2012.08.002, 2013.
- 35 Kneisel, C., Hauck, C., Fortier, R. and Moorman, B.: Advances in geophysical methods for permafrost investigations, *Permafrost Periglac.*, 19(2), 157–178, doi:10.1002/ppp.616, 2008.

- Kokelj, S. V. and Burn, C. R.: Ground ice and soluble cations in near-surface permafrost, Inuvik, Northwest Territories, Canada, *Permafrost Periglac.*, 14(3), 275–289, doi:10.1002/ppp.458, 2003.
- Kokelj, S. V. and Burn, C. R.: Near-surface ground ice in sediments of the Mackenzie Delta, Northwest Territories, Canada, *Permafrost Periglac.*, 16(3), 291–303, doi:10.1002/ppp.537, 2005.
- 5 Kokelj, S. V. and Jorgenson, M. T.: Advances in Thermokarst Research: Recent Advances in Research Investigating Thermokarst Processes, *Permafrost Periglac.*, 24(2), 108–119, doi:10.1002/ppp.1779, 2013.
- Kokelj, S. V., Pisaric, M. F. and Burn, C. R.: Cessation of ice-wedge development during the 20th century in spruce forests of eastern Mackenzie Delta, Northwest Territories, Canada, *Can. J. Earth Sci.*, 44(11), 1503–1515, doi:10.1139/e07-035, 2007a.
- 10 Kokelj, S. V., Burn, C. R. and Tarnocai, C.: The structure and dynamics of earth hummocks in the subarctic forest near Inuvik, Northwest Territories, Canada, *Arct. Antarct. Alp. Res.*, 39(1), 99–109, 2007b.
- Kokelj, S. V., Lantz, T. C., Wolfe, S. A., Kanigan, J. C., Morse, P. D., Coutts, R., Molina-Giraldo, N. and Burn, C. R.: Distribution and activity of ice wedges across the forest-tundra transition, western Arctic Canada, *J. Geophys. Res. Earth Surf.*, 119(9), 2032–2047, doi:10.1002/2014JF003085, 2014.
- 15 Kokelj, S. V., Tunnicliffe, J., Lacelle, D., Lantz, T. C., Chin, K. S. and Fraser, R.: Increased precipitation drives mega slump development and destabilization of ice-rich permafrost terrain, northwestern Canada, *Global Planet. Change*, 129, 56–68, doi:10.1016/j.gloplacha.2015.02.008, 2015.
- Kokelj, S. V., Lantz, T. C., Tunnicliffe, J., Segal, R. and Lacelle, D.: Climate-driven thaw of permafrost preserved glacial landscapes, northwestern Canada, *Geology*, 45(4), 371–374, doi:10.1130/G38626.1, 2017.
- 20 Kuhry, P.: Palsa and peat plateau development in the Hudson Bay Lowlands, Canada: timing, pathways and causes, *Boreas*, 37(2), 316–327, doi:10.1111/j.1502-3885.2007.00022.x, 2008.
- Laberge, M.-J. and Payette, S.: Long-Term Monitoring of Permafrost Change in a Palsa Peatland in Northern Quebec, Canada: 1983-1993, *Arct. Alp. Res.*, 27(2), 167, doi:10.2307/1551898, 1995.
- 25 Labrecque, S., Lacelle, D., Duguay, C., Lauriol, B. and Hawkins, J.: Contemporary (1951-2001) evolution of lakes in the Old Crow Basin, Northern Yukon, Canada: Remote sensing, numerical modeling, and stable isotope analysis, *Arctic*, 62(2), 225–238, 2009.
- Lacelle, D., Brooker, A., Fraser, R. H. and Kokelj, S. V.: Distribution and growth of thaw slumps in the Richardson Mountains–Peel Plateau region, northwestern Canada, *Geomorphology*, 235, 40–51, doi:https://doi.org/10.1016/j.geomorph.2015.01.024, 2015.
- 30 Lachenbruch, A. H.: Mechanics of thermal contraction cracks and ice-wedge polygons in permafrost, *Special Papers Vol 70*, Geological Society of America., 1962.
- Lakeman, T. R. and England, J. H.: Paleoglaciological insights from the age and morphology of the Jesse moraine belt, western Canadian Arctic, *Quat. Sci. Rev.*, 47, 82–100, doi:https://doi.org/10.1016/j.quascirev.2012.04.018, 2012.
- Lakeman, T. R. and England, J. H.: Late Wisconsinan glaciation and postglacial relative sea-level change on western Banks Island, Canadian Arctic Archipelago, *Quat. Res.*, 80(01), 99–112, doi:https://doi.org/10.1016/j.yqres.2013.02.001, 2013.



- Lantz, T. C. and Kokelj, S. V.: Increasing rates of retrogressive thaw slump activity in the Mackenzie Delta region, N.W.T., Canada, *Geophys. Res. Lett.*, 35(6), doi:10.1029/2007GL032433, 2008.
- Larsen, C. P. S.: Spatial and temporal variations in boreal forest fire frequency in northern Alberta, *J. Biogeogr.*, 24(5), 663–673, doi:10.1111/j.1365-2699.1997.tb00076.x, 1997.
- 5 Lewkowicz, A. G.: Dynamics of active-layer detachment failures, Fosheim Peninsula, Ellesmere Island, Nunavut, Canada, *Permafrost Periglac.*, 18(1), 89–103, doi:10.1002/ppp.578, 2007.
- Liljedahl, A. K., Boike, J., Daanen, R. P., Fedorov, A. N., Frost, G. V., Grosse, G., Hinzman, L. D., Iijma, Y., Jorgenson, J. C., Matveyeva, N., Necsoiu, M., Reynolds, M. K., Romanovsky, V. E., Schulla, J., Tape, K. D., Walker, D. A., Wilson, C. J., Yabuki, H. and Zona, D.: Pan-Arctic ice-wedge degradation in warming permafrost and its influence on tundra hydrology, *Nat. Geosci.*, 9(4), 312–318, doi:10.1038/ngeo2674, 2016.
- 10 Liston, G. E., Mcfadden, J. P., Sturm, M. and Pielke, R. A.: Modelled changes in arctic tundra snow, energy and moisture fluxes due to increased shrubs, *Global Change Biol.*, 8(1), 17–32, doi:10.1046/j.1354-1013.2001.00416.x, 2002.
- Lorrain, R. D. and Demeur, P.: Isotopic evidence for relic Pleistocene glacier ice on Victoria Island, Canadian Arctic Archipelago, *Arct. Alp. Res.*, 17(1), 89, doi:10.2307/1550964, 1985.
- 15 Mackay, J. R.: The Mackenzie Delta area, Memoir 8, Geographical Branch, Department of Mines and Technical Surveys, Ottawa, ON, Canada., 1963.
- Mackay, J. R.: The origin of massive icy beds in permafrost, western Arctic coast, Canada, *Can. J. Earth Sci.*, 8(4), 397–422, doi:10.1139/e71-043, 1971.
- Mackay, J. R.: The growth of pingos, western Arctic coast, Canada, *Can. J. Earth Sci.*, 10(6), 979–1004, doi:10.1139/e73-086, 1973.
- 20 Mackay, J. R.: Ice-wedge cracks, Garry Island, Northwest Territories, *Can. J. Earth Sci.*, 11(10), 1366–1383, doi:10.1139/e74-133, 1974.
- Mackay, J. R.: Downward water movement into frozen ground, western arctic coast, Canada, *Can. J. Earth Sci.*, 20(1), 120–134, doi:10.1139/e83-012, 1983.
- 25 Mackay, J. R.: The first 7 years (1978–1985) of ice wedge growth, Illisarvik experimental drained lake site, western Arctic coast, *Can. J. Earth Sci.*, 23(11), 1782–1795, doi:10.1139/e86-164, 1986.
- Mackay, J. R.: The frequency of ice-wedge cracking (1967–1987) at Garry Island, western Arctic coast, Canada, *Can. J. Earth Sci.*, 29(2), 236–248, doi:10.1139/e92-022, 1992.
- Mackay, J. R.: Active layer changes (1968 to 1993) following the forest-tundra fire near Inuvik, N.W.T., Canada, *Arct. Alp. Res.*, 27(4), 323, doi:10.2307/1552025, 1995.
- 30 Mackay, J. R. and Burn, C. R.: The first 20 years (1978-1979 to 1998-1999) of active-layer development, Illisarvik experimental drained lake site, western Arctic coast, Canada, *Can. J. Earth Sci.*, 39(11), 1657–1674, doi:10.1139/e02-068, 2002a.
- Mackay, J. R. and Burn, C. R.: The first 20 years (1978-1979 to 1998–1999) of ice-wedge growth at the Illisarvik experimental drained lake site, western Arctic coast, Canada, *Can. J. Earth Sci.*, 39(1), 95–111, doi:10.1139/e01-048, 2002b.
- 35

- Mackay, J. R. and Dallimore, S. R.: Massive ice of the Tuktoyaktuk area, western Arctic coast, Canada, *Can. J. Earth Sci.*, 29(6), 1235–1249, doi:10.1139/e92-099, 1992.
- Martini, I. P. and Morrison, R. I. G.: Coasts of Foxe Basin, Arctic Canada, *Geol. Soc. Spec. Publ.*, 388(1), 165–198, doi:10.1144/SP388.14, 2014.
- 5 Matthews, J. V., Schweger, C. E. and Janssens, J. A.: The last (Koy-Yukon) interglaciation in the northern Yukon: evidence from unit 4 at Ch’ijee’s Bluff, Bluefish Basin, *Géographie physique et Quaternaire*, 44(3), 341, doi:10.7202/032835ar, 1990.
- Miller, R. D.: Freezing and heaving of saturated and unsaturated soils, Highway Research Record 393, U.S. National Research Council, Washington, D.C., 1972.
- Morgan, A. V.: Late Wisconsinan ice-wedge polygons near Kitchener, Ontario, Canada, *Can. J. Earth Sci.*, 9(6), 607–617, doi:10.1139/e72-052, 1972.
- 10 Morse, P. D., Burn, C. R. and Kokelj, S. V.: Near-surface ground-ice distribution, Kendall Island Bird Sanctuary, western Arctic coast, Canada, *Permafrost Periglac.*, 20(2), 155–171, doi:10.1002/ppp.650, 2009.
- Murton, J.: Thermokarst sediments and sedimentary structures, Tuktoyaktuk Coastlands, western Arctic Canada, *Global Planet. Change*, 28(1–4), 175–192, doi:https://doi.org/10.1016/S0921-8181(00)00072-2, 2001.
- 15 Murton, J. B.: Ground-ice stratigraphy and formation at North Head, Tuktoyaktuk Coastlands, western Arctic Canada: a product of glacier-permafrost interactions, *Permafrost Periglac.*, 16(1), 31–50, doi:10.1002/ppp.513, 2005.
- Murton, J. B., Whiteman, C. A., Waller, R. I., Pollard, W. H., Clark, I. D. and Dallimore, S. R.: Basal ice facies and supraglacial melt-out till of the Laurentide Ice Sheet, Tuktoyaktuk Coastlands, western Arctic Canada, *Quat. Sci. Rev.*, 24(5–6), 681–708, doi:https://doi.org/10.1016/j.quascirev.2004.06.008, 2005.
- 20 Nelson, F. E., Anisimov, O. A. and Shiklomanov, N. I.: Subsidence risk from thawing permafrost, *Nature*, 410(6831), 889–890, doi:10.1038/35073746, 2001.
- Olefeldt, D., Goswami, S., Grosse, G., Hayes, D., Hugelius, G., Kuhry, P., McGuire, A. D., Romanovsky, V. E., Sannel, A. B. K., Schuur, E. A. G. and Turetsky, M. R.: Circumpolar distribution and carbon storage of thermokarst landscapes, *Nat. Commun.*, 7, 13043, doi:10.1038/ncomms13043, 2016.
- 25 O’Neill, H. B. and Burn, C. R.: Physical and temporal factors controlling the development of near-surface ground ice at Illisarvik, western Arctic coast, Canada, *Can. J. Earth Sci.*, 49(9), 1096–1110, doi:10.1139/e2012-043, 2012.
- O’Neill, H. B. and Christiansen, H. H.: Detection of ice wedge cracking in permafrost using miniature accelerometers, *J. Geophys. Res. Earth Surf.*, 123(4), 642–657, doi:10.1002/2017JF004343, 2018.
- O’Neill, H. B., Burn, C. R., Kokelj, S. V. and Lantz, T. C.: ‘Warm’ tundra: Atmospheric and near-surface ground temperature inversions across an alpine treeline in continuous permafrost, western Arctic, Canada, *Permafrost Periglac.*, 26(2), 103–118, doi:10.1002/ppp.1838, 2015.
- 30 Opel, T., Meyer, H., Wetterich, S., Laepple, T., Dereviagin, A. and Murton, J.: Ice wedges as archives of winter paleoclimate: A review, *Permafrost Periglac.*, 29(3), 199–209, doi:10.1002/ppp.1980, 2018.
- Overton, S.: A strategy of model construction, in *Ecosystem Modeling in Theory and Practice: An Introduction with Case Histories.*, John Wiley & Sons, New York, USA., 1977.
- 35

- Palmer, M. J., Burn, C. R. and Kokelj, S. V.: Factors influencing permafrost temperatures across tree line in the uplands east of the Mackenzie Delta, 2004–2010, *Can. J. Earth Sci.*, 49(8), 877–894, doi:10.1139/e2012-002, 2012.
- Payette, S.: Accelerated thawing of subarctic peatland permafrost over the last 50 years, *Geophys. Res. Lett.*, 31(18), doi:10.1029/2004GL020358, 2004.
- 5 Payette, S., Morneau, C., Sirois, L. and Despons, M.: Recent fire history of the northern Quebec biomes, *Ecology*, 70(3), 656–673, doi:10.2307/1940217, 1989.
- Pollard, W. H.: Distribution and characterization of ground ice on Fosheim Peninsula, Ellesmere Island, Nunavut, in *Environmental response to climate change in the Canadian High Arctic*; by Garneau, M (ed.); Alt, B T (ed.); Bulletin 529, pp. 207–233, Geological Survey of Canada, Ottawa, ON, Canada., 2000.
- 10 Pollard, W. H. and French, H. M.: A first approximation of the volume of ground ice, Richards Island, Pleistocene Mackenzie delta, Northwest Territories, Canada, *Can. Geotech. J.*, 17(4), 509–516, doi:10.1139/t80-059, 1980.
- Prest, V. K., Grant, D. R. and Rampton, V. N.: Glacial map of Canada, “A” Series Map 1253A, Scale 1:5,000,000, Geological Survey of Canada, Ottawa, ON, Canada., 1968.
- 15 Rampton, V. and Mackay, J. R.: Massive ice and icy sediments throughout the Tuktoyaktuk Peninsula, Richards Island and nearby areas, District of Mackenzie, Paper 71-21, Geological Survey of Canada, Ottawa, ON, Canada., 1971.
- Rampton, V. N.: Origin of massive ground ice on Tuktoyaktuk Peninsula, Northwest Territories, Canada: a review of stratigraphic and geomorphic evidence, in *Proceedings of the 5th International Conference on Permafrost*, vol. 1, pp. 850–855, Tapir, Trondheim, Norway., 1988a.
- 20 Rampton, V. N.: Quaternary Geology of the Tuktoyaktuk Coastlands, Northwest Territories, Memoir 423, Geological Survey of Canada, Ottawa, ON, Canada., 1988b.
- Raynolds, M. K., Walker, D. A., Ambrosius, K. J., Brown, J., Everett, K. R., Kanevskiy, M., Kofinas, G. P., Romanovsky, V. E., Shur, Y. and Webber, P. J.: Cumulative geocological effects of 62 years of infrastructure and climate change in ice-rich permafrost landscapes, Prudhoe Bay Oilfield, Alaska, *Global Change Biol.*, 20(4), 1211–1224, doi:10.1111/gcb.12500, 2014.
- 25 Riseborough, D., Shiklomanov, N., Etzelmüller, B., Gruber, S. and Marchenko, S.: Recent advances in permafrost modelling, *Permafrost Periglac.*, 19(2), 137–156, doi:10.1002/ppp.615, 2008.
- Robinson, S. D. and Pollard, W. H.: Massive ground ice within Eureka Sound bedrock, Ellesmere Island, Canada, in *Proceedings of the 7th International Permafrost Conference*, Collection Nordicana, vol. 57, pp. 949–954, Centre d’études nordiques, Université Laval, Québec City, Canada., 1998.
- 30 Roy-Leveillé, P. and Burn, C. R.: Geometry of oriented lakes in Old Crow Flats, northern Yukon, in *Proceedings, 68th Canadian Geotechnical Conference and 7th Canadian Permafrost Conference*, pp. 1–8, Canadian Geotechnical Society, Richmond, BC, Canada., 2015.
- Roy-Leveillé, P. and Burn, C. R.: Near-shore talik development beneath shallow water in expanding thermokarst lakes, Old Crow Flats, Yukon, *J. Geophys. Res. Earth Surf.*, 122(5), 1070–1089, doi:10.1002/2016JF004022, 2017.
- 35 Rudy, A. C. A., Lamoureux, S. F., Kokelj, S. V., Smith, I. R. and England, J. H.: Accelerating Thermokarst Transforms Ice-Cored Terrain Triggering a Downstream Cascade to the Ocean: Thermokarst Triggers a Cascade to Ocean, *Geophys. Res. Lett.*, 44(21), 11,080–11,087, doi:10.1002/2017GL074912, 2017.

- Rykiel, E. J.: Testing ecological models: the meaning of validation, *Ecol. Modell.*, 90(3), 229–244, doi:10.1016/0304-3800(95)00152-2, 1996.
- Segal, R. A., Kokelj, S. V., Lantz, T. C., Pierce, K. L., Durkee, K., Gervais, S., Mahon, E., Snijders, M., Buysse, J. and Schwarz, S.: Mapping of terrain affected by retrogressive thaw slumping in Northwestern Canada, Open Report 2016-023, Northwest Territories Geological Survey., 2016.
- Shur, Y., Hinkel, K. M. and Nelson, F. E.: The transient layer: implications for geocryology and climate-change science, *Permafrost Periglac.*, 16(1), 5–17, doi:10.1002/ppp.518, 2005.
- Shur, Y. L. and Jorgenson, M. T.: Patterns of permafrost formation and degradation in relation to climate and ecosystems, *Permafrost Periglac.*, 18(1), 7–19, doi:10.1002/ppp.582, 2007.
- 10 Silver, N.: *The signal and the noise: why so many predictions fail-but some don't*, Penguin Press, New York, USA., 2012.
- Smith, S. L. and Burgess, M. M.: Sensitivity of permafrost to climate warming in Canada, Bulletin 579, Geological Survey of Canada, Ottawa, ON, Canada., 2004.
- Smith, S. L., Romanovsky, V. E., Lewkowicz, A. G., Burn, C. R., Allard, M., Clow, G. D., Yoshikawa, K. and Throop, J.: Thermal state of permafrost in North America: a contribution to the international polar year, *Permafrost and Periglacial Processes*, 21(2), 117–135, doi:10.1002/ppp.690, 2010.
- 15 Stevens, C. W., Kerr, D. E., Wolfe, S. A. and Eagles, S.: Predictive surficial geology, Yellowknife and Hearne Lake, Northwest Territories, NTS 85-J and NTS 85-I, Canadian Geoscience Map 200, Scale 1:125:000, Natural Resources Canada, Ottawa, ON, Canada., 2017.
- St-Onge, D. A. and McMartin, I.: Quaternary geology of the Inman River area, Northwest Territories, Bulletin 446, Geological Survey of Canada, Ottawa, ON, Canada., 1995.
- 20 Sturm, M., Holmgren, J., McFadden, J. P., Liston, G. E., Chapin, F. S. and Racine, C. H.: Snow–Shrub Interactions in Arctic Tundra: A Hypothesis with Climatic Implications, *J. Clim.*, 14(3), 336–344, doi:10.1175/1520-0442(2001)014<0336:SSIIAT>2.0.CO;2, 2001.
- Sweeney, S. J. and Smalley, I. J.: Occurrence and geotechnical properties of loess in Canada, *Eng. Geol.*, 25(2–4), 123–134, doi:10.1016/0013-7952(88)90023-3, 1988.
- 25 Taber, S.: Frost Heaving, *J. Geol.*, 37(5), 428–461, doi:10.1086/623637, 1929.
- Tarnocai, C., Kettles, I. M. and Lacelle, B.: Peatlands of Canada, Open File 6561, Geological Survey of Canada, Ottawa, ON, Canada., 2011.
- Turner, K. W., Wolfe, B. B., Edwards, T. W. D., Lantz, T. C., Hall, R. I. and Larocque, G.: Controls on water balance of shallow thermokarst lakes and their relations with catchment characteristics: a multi-year, landscape-scale assessment based on water isotope tracers and remote sensing in Old Crow Flats, Yukon (Canada), *Global Change Biol.*, 20(5), 1585–1603, doi:10.1111/gcb.12465, 2014.
- 30 Ulrich, M., Grosse, G., Strauss, J. and Schirrmeister, L.: Quantifying Wedge-Ice Volumes in Yedoma and Thermokarst Basin Deposits: Wedge-Ice Volume Calculation in Yedoma and Thermokarst Basin Deposits, *Permafrost Periglac.*, 25(3), 151–161, doi:10.1002/ppp.1810, 2014.
- 35

Viereck, L. A.: The effects of fire in black spruce ecosystems of Alaska and northern Canada, in *The role of fire in northern circumpolar ecosystems*, pp. 210–220, Wiley, New York, USA., 1983.

Wheeler, J. O., Hoffman, P. F., Card, K. D., Davidson, A., Sanford, B. V., Okulitch, A. V. and Roest, W. R.: Geological map of Canada, “A” Series Map 1860A, Scale 1:5,000,000, Natural Resources Canada, Ottawa, ON, Canada., 1996.

- 5 Wolfe, S. A., Stevens, C. W., Gaanderse, A. J. and Oldenborger, G. A.: Lithalsa distribution, morphology and landscape associations in the Great Slave Lowland, Northwest Territories, Canada, *Geomorphology*, 204, 302–313, doi:10.1016/j.geomorph.2013.08.014, 2014.

Wolfe, S. A., Kerr, D. E. and Morse, P. D.: Slave Geological Province: An Archetype of Glaciated Shield Terrain, in *Landscapes and Landforms of Western Canada*; by Slaymaker O. (ed.), pp. 77–86, Springer, Switzerland., 2017.

- 10 Zoltai, S. C.: Palsas and Peat Plateaus in Central Manitoba and Saskatchewan, *Can. J. For. Res.*, 2(3), 291–302, doi:10.1139/x72-046, 1972.

Zoltai, S. C. and Tarnocai, C.: Properties of A Wooded Palsa in Northern Manitoba, *Arct. Alp. Res.*, 3(2), 115–129, 1971.

Shur, Y.L., 1988. The upper horizon of permafrost soils. In *Proceedings of the Fifth International Conference on Permafrost*, Vol. 1, Senneset, K. (Ed.). Tapir Publishers, Trondheim, Norway, pp. 867–871.

Shur, Y., Jorgenson, M.T., Kanevskiy, M.Z., 2011. Permafrost. In: Singh, V.P., Singh, P., Haritashya, U.K. (Eds.), *Encyclopedia of Earth Sciences Series, Encyclopedia of Snow, Ice and Glaciers*. Springer, Dordrecht, The Netherlands:pp. 841–848. <http://dx.doi.org/10.1007/978-90-481-2642-2>.

Jorgenson, T., Kanevskiy, M.Z., Shur, Y., Moskalenko, N.G., Brown, D.R.N., Wickland, K., Striegl, R., Koch, J., 2015. Ground ice dynamics and ecological feedbacks control ice-wedge degradation and stabilization. *JGR Earth Surface* 120 (11): 2280–2297. <http://dx.doi.org/10.1002/2015JF003602>.
